1 **Zika virus infection preferentially counterbalances human peripheral**  
2 **monocyte and/or NK-cell activity**

3

4 Fok-Moon Lum<sup>1</sup>, David Lee<sup>2</sup>, Tze-Kwang Chua<sup>1</sup>, Jeslin J.L. Tan<sup>1</sup>, Cheryl Y.P.  
5 Lee<sup>1,3</sup>, Xuan Liu<sup>4,5</sup>, Yongxiang Fang<sup>4</sup>, Bennett Lee<sup>1</sup>, Wearn-Xin Yee<sup>1</sup>, Natasha  
6 Y. Rickett<sup>5,6</sup>, Po-Ying Chia<sup>7</sup>, Vanessa Lim<sup>7</sup>, Yee-Sin Leo<sup>7,8,9</sup>, David A.  
7 Matthews<sup>2</sup>, Julian A. Hiscox<sup>1,5,6\*</sup>, Lisa F.P. Ng<sup>1,5,6,10\*</sup>

8

9 <sup>1</sup>Singapore Immunology Network, Agency for Science, Technology and  
10 Research (A\*STAR), Singapore 138648, Singapore.

11 <sup>2</sup>School of Cellular and Molecular Medicine, University of Bristol, Bristol BS8  
12 1TD, UK.

13 <sup>3</sup>NUS Graduate School for Integrative Sciences and Engineering, National  
14 University of Singapore, Singapore 117456, Singapore.

15 <sup>4</sup>Centre for Genomic Research, Institute of Integrative Biology, University of  
16 Liverpool, Liverpool L69 7ZB, UK.

17 <sup>5</sup>National Institute of Health Research, Health Protection Research Unit In  
18 Emerging and Zoonotic Infections, University of Liverpool, Liverpool L69 3GL,  
19 UK.

20 <sup>6</sup>Institute of Infection and Global Health, University of Liverpool, Liverpool L69  
21 7BE, UK.

22 <sup>7</sup>Communicable Diseases Centre, Institute of Infectious Diseases and  
23 Epidemiology, Tan Tock Seng Hospital, Singapore 308433, Singapore.

24 <sup>8</sup>Lee Kong Chian School of Medicine, Nanyang Technological University,  
25 Singapore 636921, Singapore.

26 <sup>9</sup>Saw Swee Hock School of Public Health, National University of Singapore,  
27 Singapore 117549, Singapore.

28 <sup>10</sup>Department of Biochemistry, Yong Loo Lin School of Medicine, National  
29 University of Singapore, Singapore 117597, Singapore.

30

31 Correspondence: Prof Lisa F.P. Ng ([lisa\\_ng@immunol.a-star.edu.sg](mailto:lisa_ng@immunol.a-star.edu.sg)); Prof

32 Julian A. Hiscox ([Julian.Hiscox@liverpool.ac.uk](mailto:Julian.Hiscox@liverpool.ac.uk))

33

34 Abstract: 172 words

35 Main text: 6024 words

36 Inserts: 7 Figures and 2 Tables

37 **Abstract**

38 Zika virus (ZIKV) has re-emerged in the population and caused  
39 unprecedented global outbreaks. Here, the transcriptomic consequences of  
40 ZIKV infection were studied systematically firstly in human peripheral blood  
41 CD14<sup>+</sup> monocytes and monocyte-derived macrophages with high density  
42 RNA-sequencing. Analyses of the ZIKV genome revealed that the virus  
43 underwent genetic diversification and differential mRNA abundance was  
44 found in host cells during infection. Notably, there was a significant change in  
45 the cellular response with crosstalk between monocytes and natural killer  
46 (NK) cells as one of the highly identified pathway. Immune-phenotyping of  
47 peripheral blood from ZIKV-infected patients further confirmed the activation  
48 of NK cells during acute infection. ZIKV infection in peripheral blood cells  
49 isolated from healthy donors led to the induction of IFN $\gamma$  and CD107a — two  
50 key markers of NK-cell function. Depletion of CD14<sup>+</sup> monocytes from  
51 peripheral blood resulted in a reduction of these markers and reduced priming  
52 of NK cells during infection. This was complemented by the immunoproteomic  
53 changes observed. Mechanistically, ZIKV infection preferentially  
54 counterbalances monocyte and/or NK-cell activity, with implications for  
55 targeted cytokine immunotherapies.

## 56 **Introduction**

57 Zika virus (ZIKV) gained global attention in 2015-2016 when the virus  
58 suddenly re-emerged in the human population and caused major viral  
59 outbreaks across the world with a large disease burden (1). Although ZIKV  
60 has been causing sporadic outbreaks since it was first reported in Uganda  
61 >60 years ago (2), very little is known about the biology of the virus and the  
62 host response to infection. ZIKV is an arthropod-borne flavivirus that causes  
63 Zika fever — a disease that for the majority of patients has little or no  
64 symptoms (3). However, in severe cases, ZIKV infection may be  
65 responsible for neurological complications such as Guillain Barré Syndrome  
66 (GBS) in adults (4) and congenital fetal growth-associated anomalies in  
67 newborns (5). The host response to ZIKV infection may be one of the main  
68 drivers of the different disease phenotypes.

69       Recent studies have established that ZIKV can infect peripheral  
70 blood monocytes (6-9). However, despite ongoing intensive investigative  
71 efforts to understand ZIKV-related neuropathogenesis, knowledge  
72 regarding the mechanisms of ZIKV infection in peripheral immune cells is  
73 lacking. Given that ZIKV is transmitted into the dermis via the bite from a  
74 virus-infected mosquito, monocytes would be one of the first immune cells  
75 in the blood to interact with the virus when it reaches the circulatory system.  
76 Therefore, the interplay between ZIKV and monocytes will be crucial in  
77 determining the outcome of infection (10).

78       This study focused on characterising the primary *ex vivo* response of  
79 human donor blood monocytes and monocyte-derived macrophages  
80 (MDMs) to ZIKV infection. Systematically, RNA-sequencing (RNA-seq) was

81 first used to identify and quantify the abundance of host messenger RNA  
82 (mRNA) and characterise viral RNA. This information was subsequently  
83 used to map the host response to ZIKV infection in the two different *ex vivo*  
84 cell types. These data also provided insights into the potential adaptation of  
85 the virus during viral replication in these cells. Immune-phenotyping of  
86 peripheral blood cells isolated from patients infected with ZIKV  
87 independently was executed to validate the predictions obtained from the  
88 differential gene expression analysis. Depletion of CD14<sup>+</sup> monocytes in  
89 peripheral blood was then performed *ex vivo* to functionally understand the  
90 crosstalk between monocytes and priming of NK cells during ZIKV infection.  
91 Lastly, a multiplex assay was carried out to further understand host cell  
92 immunoproteomic changes during ZIKV infection. To our knowledge, this  
93 study is the first large-scale systematic investigation into the host cellular  
94 response to ZIKV infection in biologically relevant cells. This global analysis  
95 of the host immune response provides a novel understanding of the  
96 pathobiology of the virus, leading to the possibility of targeted therapeutic  
97 interventions in severe cases.

98 **Results**

99 **ZIKV targets human peripheral blood monocytes and macrophages.**

100 CD14<sup>+</sup> monocytes have been reported to be the main targets of ZIKV  
101 during infection (6-9). In this study, human primary CD14<sup>+</sup> monocytes were  
102 first isolated from fresh peripheral blood mononuclear cells (PBMCs) to  
103 enrich this cell type to >90% of the total cell population (Figure 1A). In  
104 addition, isolated monocytes from the same donors were differentiated into  
105 monocytes-derived macrophages (MDMs) over 5 days (Figure 1B). Purified  
106 cells were then infected *ex vivo* with ZIKV and their permissiveness to ZIKV  
107 infection and growth was determined at 24 and 72 hours post-infection (hpi)  
108 (Figure 1A). The 24 hpi time point was chosen to represent the acute  
109 infection phase and the 72 hpi time point a stage by which a substantial  
110 host-virus interaction would have taken place (11). Data obtained showed  
111 that ZIKV infection of MDMs was more significant than infection of  
112 monocytes in all five donors (~40% compared to ~20% at 72 hpi,  
113 respectively) (Figure 1C). A decrease in viral load was observed in the  
114 virus-infected MDMs between the two time points, whereas the viral load  
115 remained consistent in infected monocytes over time (Figure 1D).

116 In parallel, virus infection in PBMCs obtained from four healthy  
117 human volunteers also showed that CD14<sup>+</sup> monocytes were the main  
118 immune subsets infected (Supplemental Figure 1).

119

120 **Genome variation in ZIKV during infection of the peripheral blood.** In

121 order to compare the amount of virus between the different cell types and  
122 determine whether ZIKV underwent genetic diversification during infection,

123 viral sequence reads were mapped and compared to that of the progenitor  
124 virus stock (PF/ZIKV/HPF/2013). These data indicated that for MDMs, 4.53%  
125 and 0.43% of total sequence reads mapped to the ZIKV genome at 24 hpi and  
126 72 hpi, respectively. While 24% and 0.8% of sequence reads generated from  
127 monocytes mapped to the ZIKV genome at 24 hpi and 72 hpi respectively.  
128 These observations are consistent with ZIKV viral load analysis, where higher  
129 levels of viral RNA were detected in MDMs (Figure 1).

130         Due to the inherent error-prone nature of viral RNA replication,  
131 nucleotide variants may become established in the viral genome during ZIKV  
132 infection in different cell types. To investigate this hypothesis, consensus  
133 genome information for each sample and the frequency of minor variants at  
134 each nucleotide position in the progenitor stock was determined and  
135 compared to the genome of virus present in the infected samples utilizing  
136 previously developed workflows (12,13). The ZIKV consensus genome  
137 sequence derived from the progenitor stock was 10,570 nucleotides in length  
138 and contained minor variants (as a measure of quasi-species) spread  
139 throughout the genome (Figure 2A). Of the 11 valid consensus sequences  
140 derived from the virus-infected samples, the virus recovered in cells from five  
141 donors (D1-D5) had the same consensus sequence as the input stock  
142 (PF/ZIKV/HPF/2013). However, some donor samples contained viral  
143 genomes that had additional nucleotide differences at six different positions  
144 (Table 1). These nucleotide differences (Table 1) were visualized as a  
145 maximum likelihood phylogenetic tree, where the input stock was used as the  
146 reference sample (Figure 2B). There were only eight high frequency transition  
147 mutations to choose from ( $\log_{10}8 = 0.9$ , see Figure 2A), increasing the

148 likelihood of these changes appearing several times. Of these eight transition  
149 mutations, six appeared as major variants and thus changed the overall  
150 consensus sequence. The nucleotide positions of these six transition  
151 mutations (Table 2) indicated that all the changes in the consensus sequence  
152 were already present at relatively high frequency as minor variants in the input  
153 stock and were subsequently amplified during viral replication. Changes at  
154 nucleotide positions 2,815 and 4,211 were the most common, being found in  
155 ~35% reads mapping to the virus genome. Had these changes been found in  
156  $\geq 50\%$  reads, they would have been classified as major variants and thus  
157 changed the consensus sequence (Table 2).

158

159 **Transcriptomic profiling reveals key cellular responses to ZIKV**  
160 **infection.** RNA-seq was used to identify and quantify global mRNA  
161 abundance in ZIKV-infected peripheral monocytes and MDMs at 24 and 72  
162 hpi. mRNA purified from 27 samples showed no signs of degradation and had  
163 sufficient read depth for inclusion in the analyses (Supplemental Figure 2A).  
164 For monocytes, mock and ZIKV-infected cells at both 24 and 72 hpi exhibited  
165 minimal changes in host transcript abundance. For MDMs, the abundance of  
166 transcripts that mapped to 1,736 and 545 genes at 24 and 72 hpi respectively,  
167 were significantly different ( $FDR < 0.05$ ) between the mock and ZIKV-infected  
168 samples (Supplemental Figure 2B).

169 Ingenuity Pathway Analysis (IPA) was used to interrogate and group  
170 the differentially expressed genes into functional pathways (Figure 3A). A total  
171 of 169 pathways were identified, of which 27 were common in ZIKV-infected  
172 MDMs at 24 and 72 hpi. A further 106 pathways were unique to samples at 24



173 hpi (Supplemental Table 1), and 36 pathways were unique to samples at 72  
174 hpi (Supplemental Table 2). This analysis found that genes associated with  
175 the interferon response were significantly upregulated at both time-points. In  
176 addition, signalling pathways involved in the pathogenesis of multiple  
177 sclerosis, and key pathways involved in monocyte-derived dendritic cell  
178 (moDCs) and NK cell processes were also shared between the two time  
179 points (Figure 3A). Overall, the top three common pathways activated in  
180 MDMs were interferon signalling, multiple sclerosis pathogenic pathways and  
181 crosstalk pathways between moDCs and NK cells (Figure 3A). The specific  
182 genes with the most abundant transcripts within these three pathways were  
183 analyzed, and when compared to the mock-infected controls were all  
184 increased in abundance after ZIKV infection (Figure 3B).

185

#### 186 **Virus-infected MDMs exhibit reduced cellular responsiveness.**

187 Transcriptomic profiles of various ZIKV-infected MDMs were compared to  
188 evaluate the transition of the cellular host response over the course of ZIKV  
189 infection. The percentage overlap of the identified transcripts between ZIKV-  
190 infected MDMs was assessed at 24 hpi and 72 hpi within the three targeted  
191 pathways described above (Figure 4). Interestingly, the percentage of  
192 overlapping transcripts identified at 72 hpi was lower for all three pathways,  
193 which may reveal a lower activation status of these pathways at this stage of  
194 the infection. The identification of different transcripts associated with 72 hpi  
195 may indicate the different signalling cascades present or activation status of  
196 these cells (Figure 4A). Global assessment of all identified transcripts  
197 revealed that transcripts mapping to 251 genes were in fact present in virus-

198 infected MDMs at both time points. Transcripts that mapped to 1,485 genes  
199 were specific to 24 hpi, of which 54.81% exhibited greater abundance  
200 compared to the mock controls. By comparison, transcripts that mapped to  
201 294 genes were unique to 72 hpi, with 63.36% of them having greater mRNA  
202 abundance compared to the mock controls (Figure 4B). Within the 251  
203 common genes, transcripts mapping to 218 genes had a greater fold-change  
204 value compared to the mock-infected controls, indicating that these transcripts  
205 were increased in abundance in all ZIKV-infected MDMs. Further inquiry of  
206 these transcripts revealed that 60.1% of them were greater in abundance at  
207 72 hpi compared to 24 hpi. Likewise, of the remaining transcripts that mapped  
208 to 33 genes and showed decreased abundance, 84.85% were further reduced  
209 at 72 hpi.

210

211 **NK cells are activated in ZIKV-infected patients.** IPA predicted robust  
212 crosstalk between NK cells and moDCs in peripheral blood upon *ex vivo*  
213 ZIKV infection (Figure 3-4). The IPA prediction that NK cells were activated  
214 in the peripheral blood of ZIKV-infected patients was, therefore,  
215 investigated by comprehensive immune-phenotyping of blood samples  
216 taken from ZIKV-infected patients. These patients were recruited from the  
217 first endemic ZIKV outbreak in Singapore in 2016 (7,14). Blood aliquots  
218 were obtained from ZIKV-infected patients (n=9) during the acute disease  
219 phase (between 1 and 7 days post-illness-onset), and were subjected to a  
220 whole blood staining protocol that targeted CD56<sup>+</sup> cells, predominantly NK  
221 cells (15) (Figure 5A). Blood from healthy donors (n=5) was collected and  
222 processed in parallel as a control group. Gated cells were further grouped

223 with the C-type lectin receptor CD94, giving three CD56<sup>+</sup> populations:  
224 CD56<sup>bright</sup>CD94<sup>hi</sup>, CD56<sup>dim</sup>CD94<sup>hi</sup> and CD56<sup>dim</sup>CD94<sup>lo</sup> (16). The activation  
225 status of these populations was then assessed based on the percentage of  
226 each subset expressing CD16 and CD69 (Figure 5B). A higher level of  
227 CD16 was observed across all CD56<sup>+</sup> subsets in ZIKV-infected patients  
228 compared to the healthy controls. A higher percentage of the subsets also  
229 expressed CD69 — a known cellular activation marker (17).

230

231 **CD14<sup>+</sup> monocytes prime NK-cell activity during ZIKV infection.** Given that  
232 peripheral NK cells were activated in ZIKV-infected patients and monocytes  
233 are precursors of MDMs, the functional relationship between monocytes and  
234 NK cells was assessed. CD14<sup>+</sup> monocytes were depleted from human  
235 primary PBMCs, with an average efficiency of >95% (Supplemental Figure 3).  
236 Lipopolysaccharide (LPS; 10ng/ml) was used as a positive control to simulate  
237 priming of NK cells by monocytes (18). A significant reduction in the activity of  
238 NK cells was observed when CD14-depleted PBMCs were stimulated with  
239 LPS compared to LPS stimulation of PBMCs containing CD14<sup>+</sup> monocytes  
240 (Supplemental Figure 4). This effect was evidenced by the reduced levels of  
241 the surface markers CD69, CD107a and intracellular IFN $\gamma$  in depleted cells,  
242 verifying that this approach was an efficient strategy for investigating priming  
243 of NK cells by CD14<sup>+</sup> monocytes

244 PBMCs were then isolated from seven healthy donors and subjected to  
245 CD14-depletion before being either infected with ZIKV or stimulated with LPS  
246 in parallel to serve as a control to determine activation of NK cells. ZIKV  
247 infection in non-depleted PBMCs resulted in high levels of CD107a and IFN $\gamma$

248 (Figure 6A) in CD56<sup>+</sup>CD94<sup>+</sup> NK cells (Supplemental Figure 5) at 36 hpi — an  
249 optimal time-point to detect NK-cell priming (19). The opposite effect,  
250 however, was observed in ZIKV-infected PBMCs depleted of CD14<sup>+</sup>  
251 monocytes as the levels of both CD107a and IFN $\gamma$  were significantly reduced  
252 (Figure 6B). The levels of CD107a and IFN $\gamma$  remained high at 72 hpi in non-  
253 depleted infected PBMCs compared to depleted infected PBMCs  
254 (Supplemental Figure 6). Interestingly, although monocyte depletion did not  
255 affect the expression of NK-cell activation receptors NKG2A or NKG2D, a  
256 general reduction in NKG2D-expressing NK cells was observed during ZIKV  
257 infection (Supplemental Figure 7A and 7B). Surprisingly, the activation marker  
258 CD69 was not increased upon ZIKV infection in this study (Supplemental  
259 Figure 7C and EV7D). ZIKV viral load was comparable between both  
260 conditions (Figure 6C).

261 To delve further into the mechanism, the profile of secreted immune  
262 mediators from ZIKV-infected PBMCs was quantified using a 45-plex  
263 microbead-based immunoassay (20). Levels of 11 mediators were  
264 significantly affected by the depletion of CD14<sup>+</sup> monocytes (Figure 7A and  
265 Supplemental Figure 8A), while 8 mediators were affected upon ZIKV  
266 infection (Supplemental Figure 8B). Interestingly, depletion of CD14<sup>+</sup>  
267 monocytes and ZIKV infection did not affect the levels of EGF, IL-9, IL-17A,  
268 MIP-1 $\alpha$  and MIP-1 $\beta$  (Supplemental Figure 8C). The effect of CD14<sup>+</sup>  
269 monocytes depletion was observed in the levels of SCF and TNF $\alpha$  only after  
270 ZIKV infection (Supplemental Figure 8D). Importantly, levels of MCP-1, IL1RA  
271 and VEGF-A were affected by both CD14<sup>+</sup> monocytes depletion and ZIKV  
272 infection (Figure 7B). To further investigate the capacity of the cytokine

273 milieus in priming NK cells, freshly isolated human primary PBMCs were then  
274 treated with the same culture supernatants from ZIKV-infected PBMCs and  
275 CD14<sup>+</sup> monocytes-depleted PBMCs. Stimulation with culture supernatant from  
276 ZIKV-infected non-depleted PBMCs led to slightly more cell death  
277 (Supplemental Figure 9A) accompanied by a significant upregulation in  
278 expression of CD107a, IFN $\gamma$  and NKG2D in the CD94<sup>+</sup>CD56<sup>+</sup> NK cells (Figure  
279 7C and Supplemental Figure 9B), confirming the importance of monocytes in  
280 NK-cell priming during ZIKV infection. To rule out priming of NK cells by  
281 viruses present in the culture supernatant, a UV-treatment procedure was  
282 performed to inactivate the virus, prior to the stimulation assay. Expectedly,  
283 while UV-inactivation successfully inactivated ZIKV (Supplemental Figure  
284 10A), it also affected the quality of the cytokines and led to reduced priming of  
285 NK cells (Supplemental Figure 10B).

286 **Discussion**

287 Myeloid cells are targets of active ZIKV infection (6-9,21-23) and can elicit  
288 immune responses with detrimental outcomes (6,8). Both monocytes and  
289 macrophages exhibit extensive heterogeneity (24,25). While it is difficult to  
290 obtain tissue-resident macrophages for experimental purposes, human  
291 blood is a readily accessible, valuable source of these cells. Transcriptomic  
292 profiling of *ex vivo* human blood monocytes and MDMs has revealed  
293 marked differences between these cell types (26,27). In this study, human  
294 primary monocytes were naturally differentiated into MDMs without any bias  
295 for an M1 or M2 macrophage phenotype (28). Given that these cells are  
296 targets of ZIKV infection (8), investigations into their cellular immune  
297 responses during infection will open avenues to exploit their function for  
298 therapeutic benefits.

299       The level of ZIKV infection (as assessed by the amount of ZIKV  
300 antigen and genome copy number) was higher in MDMs than monocytes,  
301 which corroborates previous observations (8). Transcriptomic differences  
302 between monocytes and MDMs (26,27) would be a plausible explanation  
303 for the differential susceptibility of these cells to ZIKV infection. It is also  
304 noteworthy that higher ZIKV infection levels were found in purified primary  
305 cell populations compared to PBMCs, perhaps due to the presence of other  
306 immune subsets in PBMCs that may dampen the overall infection level.  
307 ZIKV RNA was detected at the two time-points, 24 and 72 hpi and the virus  
308 was present as quasi-species post-infection in human primary myeloid  
309 cells. The virus consensus sequence and minor variant mapping revealed  
310 an over-representation of transition mutations at highly variable nucleotide

311 positions in the sequence reads. The proportion of these minor variants  
312 indicated a shift towards becoming major variants. A recent study that  
313 sequenced ZIKV genomes isolated from infected patients provided  
314 important information pertaining to ZIKV transmission (29). These data  
315 highlighted the degree of divergence in sequenced genomes and placed  
316 further emphasis on understanding virus evolution and transmission  
317 effectiveness (30). As not all recovered ZIKV RNA samples contained the  
318 same mutations, it will be interesting to determine how different host  
319 immune responses can lead to ZIKV quasi-species that acquire different  
320 combinations of mutations.

321 ZIKV infection led to the differential abundance of host transcripts  
322 mapping to numerous cellular genes in MDMs but not in monocytes, likely  
323 due to higher levels of infection observed in MDMs. Furthermore, it has been  
324 reported that different donors could account for significant differences in  
325 cellular responses (31,32). However, this differential effect does not  
326 necessary signify that ZIKV-infected monocytes do not elicit any cellular  
327 response to infection, but rather the differences were not measurable by  
328 RNA-seq at the read depths used in this analysis. In fact, transcript  
329 abundance of numerous genes were different between the mock and ZIKV-  
330 infected monocytes, just that the statistical threshold of  $FDR < 0.05$  was not  
331 reached and was thus excluded from further analyses. Using IPA data  
332 mining, these differentially expressed genes were involved in 133 and 63  
333 canonical cellular pathways (27 of them being shared) in MDMs at 24 and 72  
334 hpi, respectively. The lower number of cellular pathways identified in ZIKV-  
335 infected MDMs at the later 72 hpi time-point suggests that certain cellular

336 functions may be shut down post-infection (33). This effect could signify: (1)  
337 that the host cells conserve energy to focus only on essential pathways for  
338 survival; and/or (2) the host cells have succumbed to ZIKV infection, which  
339 leads to transcriptional shutdown in host cells.

340           Unsurprisingly, the IFN response was the most highly expressed  
341 signalling pathway of these common pathways at both time-points because  
342 of virus trigger (34). This observation was further complemented by the  
343 presence of few other IFN-related pathways. Observations were found for  
344 the next two most expressed pathways — pathogenesis of multiple  
345 sclerosis and crosstalk between NK cells moDCs cells — both of which  
346 involve NK cells. Although ZIKV infection has not been previously  
347 associated with multiple sclerosis due to the relatively new disease  
348 spectrum, other viral infections such as Epstein-Barr virus (35) and measles  
349 virus (36) have been linked.

350           CXCL9, CXCL10, CXCL11 and CCL5 (identified as the top genes in  
351 the pathway) are known chemokines to stimulate NK-cell activation (37,38).  
352 The increased transcript abundance of these immune mediators, coupled  
353 with others such as IL-15, is a strong indication that ZIKV-infected  
354 macrophages are primed to “communicate” with NK cells. Other recent  
355 studies have also provided evidence of cross-talk between macrophages  
356 and NK cells (18). The increased abundance of TNFSF10 and FAS  
357 transcripts in ZIKV-infected MDMs, could indicate priming of NK-cell  
358 mediated apoptosis (39). Interestingly, levels of typical NK cell-activating  
359 cytokines, such as IL-12 (40,41) and IL-18 (42,43) were not differentially  
360 expressed in this study. However, mRNA levels of IL-23 and IL-27, two



361 cytokines belonging to the family of IL-12 (44) with roles in NK-cell  
362 activation (45,46) were increased.

363 Immune-phenotyping of whole blood samples from ZIKV-infected  
364 patients revealed the presence of CD69<sup>+</sup>CD56<sup>+</sup> immune cells  
365 (predominantly the CD56<sup>+</sup> NK cells) (15), suggesting the possible priming of  
366 NK cells in ZIKV infection. The involvement of NK cells was thus explored  
367 *ex vivo* in human primary PBMCs. Interestingly, *ex vivo* culture alone led to  
368 an increase in the basal expression level of CD69 in CD56<sup>+</sup>CD94<sup>+</sup> NK cells,  
369 as previously reported (47). Furthermore, ZIKV infection resulted in reduced  
370 levels of CD69, which is a phenomenon also reported for the flavivirus tick-  
371 borne encephalitis virus infection in healthy donor NK cells (48). Moreover,  
372 NK cells behave differently *ex vivo* and *in vivo* (49), which may explain the  
373 different levels of CD69 detected in patients and in *ex vivo* ZIKV-infected  
374 NK cells. It was also reported in CD69-deficient mice that the activity of NK  
375 cells remains functional (50). High levels of key NK activation markers,  
376 including the degranulation marker CD107a and intracellular cytokine IFN $\gamma$   
377 indicate the higher activation status of NK cells. The activity of NK cells was  
378 directly dependent on the presence of CD14<sup>+</sup> monocytes. ZIKV infection of  
379 PBMCs depleted of CD14<sup>+</sup> monocytes significantly down-regulated the  
380 expression of the various NK-cell markers, demonstrating the functional role  
381 of monocytes as one of the key players for NK-cell stimulation. The data  
382 presented in this study are further supported by a recent publication in  
383 which ZIKV patients had high levels of IL-18, TNF $\alpha$  and IFN $\gamma$  (20) —  
384 immune mediators associated with NK-cell function. The usage of SJL  
385 mice, which lack NK cells (51), as a model of ZIKV infection also suggested

386 a protective role for these immune cell given that these animals succumbed  
387 to cortical malformations (52). Likewise, NK-cell-mediated immune  
388 response was significantly increased in healthy volunteers receiving a  
389 vaccination for the closely related yellow fever virus (53).

390 Interestingly, multiplex quantification of secreted immune mediators  
391 from *ex vivo* ZIKV-infected PBMCs provided an alternate perspective. IL-18  
392 and IFN $\gamma$ , two NK-cell related cytokines, were below detection limit.  
393 However, freshly isolated PBMCs stimulated with culture supernatants from  
394 ZIKV-infected PBMCs resulted in increased priming of NK cells, clearly  
395 indicating that the concoction of immune mediators are capable in driving  
396 NK-cell activation.

397 Nonetheless, the, depletion of CD14<sup>+</sup> monocytes would abrogate this  
398 activation as observed by the low levels of MCP-1, IL-1RA, VEGF-A,  
399 Eotaxin, GRO $\alpha$ , IFN $\alpha$  SDF-1 $\alpha$ , IP-10, IL-6, IL-1 $\alpha$ , IL-1 $\beta$ , IL-8, IL-21 and IL-  
400 10. The reduced levels of MCP-1 could also have a detrimental effect on  
401 NK-cell recruitment and priming (37,54), although MCP-1 and VEGF-A  
402 have been reported to drive the production of each other (55-57). The high  
403 levels of secreted IL1RA from ZIKV-infected PBMCs could also have  
404 participated in the increased priming of NK cells, as IL1RA is known to  
405 potentiate the effect of IL-2 stimulation of NK cells (58). Thus, the loss of  
406 detectable IL-2 after ZIKV infection in CD14-depleted PBMCs would further  
407 dwindle NK-cell priming. The presence of other immune mediators such as  
408 IL-6, IL-8, IL-10 and IP-10, SDF-1 $\alpha$ , GRO $\alpha$ , IL-1 $\alpha$  and IL-1 $\beta$  in ZIKV-  
409 infected non-depleted PBMCs would further provide an inflammatory  
410 condition for cellular activation. While the levels of these immune mediators

411 have been reported to be high in ZIKV patients (20), IL-10 and IP-10 have  
412 been demonstrated to contribute to cytolysis and activation of NK cells  
413 (37,59). Levels of LIF (60), IL-22 (61) and IL-31 (62) were high upon ZIKV  
414 infection, indicating their roles in regulating T cells during ZIKV infection  
415 (63). T cells can regulate NK-cell activity (64) and monocytes could  
416 indirectly mediate NK-cells functions through the T lymphocytes.

417 To conclude, through a systematic investigative workflow combining  
418 approaches exploring host cell transcriptomes and immunoproteomes, it was  
419 demonstrated that monocytes and macrophages do not act alone, but in  
420 conjunction with other immune cells to orchestrate a series of host immune  
421 response and drive disease progression. As such, a comprehensive  
422 understanding of immune-cell interaction will have important clinical  
423 implications for the design of novel therapeutics that can either dampen down  
424 or enhance a response as appropriate.

425 **Materials and Methods**

426 **Ethics approval and consent to participate.** Whole blood samples were  
427 collected from ZIKV-infected patients who were referred to the Communicable  
428 Disease Centre, Tan Tock Seng Hospital, Singapore. Blood was obtained  
429 from patients who provided written informed consent. The study protocol was  
430 approved by the SingHealth Centralized Institutional Review Board (CIRB  
431 Ref: 2016/2219). Blood samples were collected from healthy donors with  
432 written consent in accordance with guidelines from the Health Sciences  
433 Authority of Singapore (study approval number: NUS IRB: 10-250).

434

435 **Patient whole blood samples.** This study utilized whole blood samples  
436 obtained from patients admitted to the Communicable Disease Centre at Tan  
437 Tock Seng Hospital, Singapore from 27 August to 18 October 2016. Samples  
438 included in this study were collected during the acute phase (1-7 pio) of ZIKV  
439 infection. These patients were confirmed to be infected with ZIKV by reverse-  
440 transcription polymerase chain reaction (RT-PCR) performed on serum and  
441 urine samples obtained during their first visit to the clinic. Whole blood  
442 samples were collected in EDTA Vacutainer tubes (Becton Dickinson). Whole  
443 blood samples were also obtained from healthy volunteers as controls, which  
444 were confirmed to be negative for ZIKV RNA by RT-PCR.

445

446 **Virus preparation.** The ZIKV strain (accession KJ776791) used in this study  
447 was originally isolated from the French Polynesia outbreak in 2013 (65). The  
448 virus was propagated as previously described (8). Briefly, the virus was  
449 propagated by multiple passages in Vero-E6 cells (ATCC; CRL-1587) and

450 pre-cleared by centrifugation before storing at  $-80^{\circ}\text{C}$ . The virus titre was  
451 determined using standard plaque assays with Vero-E6 cells. Vero-E6 cells  
452 were regularly tested for mycoplasma contamination and were grown and  
453 passaged in Dulbecco's Modified Eagle Medium (DMEM; HyClone)  
454 supplemented with 10% (vol/vol) FBS. UV-inactivation of ZIKV was performed  
455 with the CL-1000 UV cross-linker (UVP) at intensity of  $100\text{mJ}/\text{cm}^2$  for 10  
456 minutes.

457

458 **Isolation and depletion of monocytes from human PBMCs.** Monocytes  
459 were prepared from fresh human PBMCs as previously described (8) and by  
460 gradient centrifugation using Ficoll-Paque density gradient media (GE  
461 Healthcare). Subsequently, monocytes were isolated using an indirect  
462 magnetic labelling system (Monocyte Isolation Kit II, Miltenyi Biotec). A direct  
463 magnetic labelling system (Human CD14<sup>+</sup> monocytes isolation kit 2,  
464 STEMCELL) was used for depletion of monocytes from PBMCs. The  
465 manufacturers' protocols were strictly adhered to for these procedures.

466

467 **Differentiation of monocytes into MDMs.** Isolated monocytes were  
468 differentiated into MDMs by plating in complete Iscove Modified Dulbecco's  
469 Medium (IMDM) (Hyclone) supplemented with 10% (vol/vol) heat-inactivated  
470 human serum (HS) (Sigma-Aldrich), which was replaced every 2 days. ZIKV  
471 infections were performed on monocytes and MDMs 5 days later, as  
472 described below.

473

474 *Virus infection.* ZIKV infections were performed at multiplicity of infection  
475 (MOI) 10. Each infection mix consisted of a virus suspension prepared in  
476 serum-free IMDM (Hyclone). The cells were incubated with the infection mix  
477 at 37°C and allowed to adsorb for 2 h with intermittent shaking before the  
478 virus inoculum was removed and replaced with complete IMDM supplemented  
479 with 10% (vol/vol) HS (Sigma-Aldrich). Cells were incubated at 37°C until  
480 harvesting at 24 and 72 hpi. The harvested cells for downstream total RNA  
481 isolation were stored at -80°C. A total of 140 µl of the infected cell suspension  
482 was used to quantify the viral load. For assessment of monocyte function in  
483 NK-cell activation during ZIKV infection, total human PBMCs and donor-  
484 corresponding CD14-depleted PBMCs were infected with ZIKV at MOI 10. In  
485 parallel, both PBMC fractions were stimulated with 10ng/ml  
486 lipopolysaccharide (LPS; Sigma) as a positive control to measure NK-cell  
487 activation. Cells were subsequently treated with 1X Brefeldin (eBioscience)  
488 and stained with CD107a (BD Pharmingen) 6 h before harvesting at 36 hpi.  
489 The viral load was quantified from 140 µl of the infected cell suspension.  
490 Negative controls were cells undergoing the same infection conditions in the  
491 absence of infectious ZIKV particles. These controls are referred to as mock-  
492 infected samples.

493

494 **PBMCs stimulation assay.** Fresh PBMCs were isolated as described above  
495 and subjected to stimulation with ZIKV-infected culture supernatants in a final  
496 ration of 1:10 in fresh IMDM (Hyclone) supplement with 10% (vol/vol) of HS  
497 (Sigma-Aldrich). Cells were subsequently treated with 1X Brefeldin

498 (eBioscience) and stained with CD107a (BD Pharmingen) 6 h before  
499 harvesting at 36 h for downstream antibodies staining.

500

501 **Viral RNA extraction and viral load analysis.** Viral RNA was extracted  
502 using a QIAamp® Viral RNA Mini Kit (QIAGEN), according to manufacturer's  
503 instructions. Quantification of ZIKV NS5 RNA was determined by quantitative  
504 real time-PCR (qRT-PCR) TaqMan assay (66) using a QuantiTect® Probe  
505 RT-PCR Kit (QIAGEN) in a 12.5 µl reaction volume. All reactions were  
506 performed on a 7900HT Fast Real-Time PCR System machine (Applied  
507 Biosciences).

508

509 **Total RNA extraction.** Total RNA was extracted using an RNeasy Mini Kit  
510 (QIAGEN) according to the manufacturer's instructions. The extracted total  
511 RNA was quantified on a Nanodrop 1000 spectrophotometer (Thermo Fisher  
512 Scientific).

513

514 **Flow cytometry and antibodies.** Detection of ZIKV antigen was carried out  
515 in a two-step indirect intracellular labelling process. Briefly, harvested cells  
516 were first fixed and permeabilized with FACS lysing solution (BD Biosciences)  
517 and FACS permeabilization solution 2 (BD Biosciences), respectively. Antigen  
518 staining was then performed with a flavivirus-specific mouse monoclonal  
519 antibody (clone 4G2) (Millipore) followed by secondary staining with a goat  
520 anti-mouse IgG F(ab')<sub>2</sub> antibody (Invitrogen). Cells were then specifically  
521 stained for the surface markers CD45 and CD14 (for ZIKV-infected  
522 monocytes and MDMs). Dead cells were excluded by staining with the

523 LIVE/DEAD Fixable Aqua Dead Cell Stain Kit (Life Technologies). For  
524 PBMCs, surface markers CD45, CD14, CD3, CD19 and CD56 were stained  
525 prior to intracellular staining (for ZIKV-infected PBMCs). For patient samples,  
526 100  $\mu$ l of whole blood was stained for the surface markers, CD45, CD56,  
527 CD94, CD16, CD69, CD107a, NKG2D and NKG2A. The stained cells were  
528 subsequently incubated with FACS lysing solution (BD Biosciences) to lyse  
529 the red blood cells. CD56<sup>+</sup> cells were first identified and were subsequently  
530 further defined with the CD94 surface marker to give three other subsets -  
531 CD56<sup>bright</sup>CD94<sup>hi</sup>, CD56<sup>dim</sup>CD94<sup>hi</sup> and CD56<sup>dim</sup>CD94<sup>lo</sup> (16). To specifically  
532 assess NK-cell activity *ex vivo*, PBMC fractions were stained for CD107a and  
533 various lineage markers (CD3, CD19, CD20 and CD14) (15) in addition to the  
534 panel of antibodies used for patient whole blood staining. The usage of  
535 lineage markers excludes the presence of non-NK cells in the ensuing  
536 analysis. Stained PBMCs were fixed and permeabilized as described above  
537 before intracellular staining of ZIKV antigen and IFN $\gamma$ .

538 All antibodies used were mouse anti-human and were obtained from  
539 BD Pharmingen (CD3, CD19, CD20, CD14, CD69, CD56, CD94, NKG2D,  
540 CD107a and IFN $\gamma$ ), Biolegend (CD16 and CD45) and Miltenyi Biotec  
541 (NKG2A). Data were acquired on a Fortessa flow cytometer (BD Biosciences)  
542 with BD FACSDiva<sup>TM</sup> software. Data analysis was performed using FlowJo  
543 version 9.3.2 software (Tree Star, Inc).

544

545 **Cytokines quantification using microbead-based immunoassay and data**  
546 **analyses.** Cytokine levels in supernatant obtained from mock and ZIKV-  
547 infected PBMCs were measured simultaneously using the ProcartaPlex<sup>TM</sup>



548 immunoassay (Thermo Fisher Scientific) detecting for 45 secreted cytokines,  
549 chemokines and growth factors including brain derived neurotropic factor  
550 (BDNF); Eotaxin/CCL11; epidermal growth factor (EGF); fibroblast growth  
551 factor 2 (FGF-2); granulocyte macrophage-colony stimulating factor (GM-  
552 CSF); growth-related oncogene (GRO) alpha/CXCL1; hepatocyte growth  
553 factor (HGF); nerve growth factor (67) beta; leukemia inhibitory factor (10);  
554 interferon (IFN) alpha; IFN gamma; interleukin (IL)-1 beta; IL-1 alpha; IL-1RA;  
555 IL-2; IL-4; IL-5; IL-6; IL-7; IL-8/CXCL8; IL-9; IL-10; IL-12p70; IL-13; IL-15; IL-  
556 17A; IL-18; IL-21; IL-22; IL-23; IL-27; IL-31; interferon-gamma induced protein  
557 (IP)-10/CXCL10; monocyte chemoattractant protein (MCP-1/CCL2);  
558 macrophage inflammatory protein (MIP)-1 alpha/CCL3; MIP-1 beta/CCL4;  
559 regulated on activation, normal T cell expressed and secreted  
560 (RANTES)/CCL5; stromal cell-derived factor (SDF)-1 alpha/CXCL12; tumor  
561 necrosis factor (TNF) alpha; TNF beta/LTA; Platelets-derived growth factor  
562 (PDGF)-BB; placental growth factor (PLGF); stem cell factor (SCF); vascular  
563 endothelial growth factor (VEGF)-A; VEGF-D. Preparation of samples,  
564 reagents and immunoassay procedures were performed according to  
565 manufacturers' instructions. Data were acquired using Luminex FlexMap 3D®  
566 instrument (Millipore) and analyzed using Bio-plex Manager™ 6.0 software  
567 (Bio-Rad) based on standard curves plotted through a five-parameter logistic  
568 curve setting. Levels of BDNF, FGF-2, HGF, NGF, IFN gamma, IL-4, IL-5, IL-  
569 7, IL-12p70, IL-13, IL-15, IL-18, RANTES, PDGF-BB, PLGF and VEGF-D  
570 were below detection limit and excluded for further analysis. Hierarchical  
571 clustering was done using TM4-MeV (<http://mev.tm4.org/>).  
572

573 **RNA-seq and differential gene expression analysis.** The general approach  
574 to RNA-seq and differential expression has been previously described  
575 (10,68), and is detailed in brief below.

576

577 **RNA-seq.** RNA samples were treated with DNase using an Ambion Turbo  
578 DNA-free Kit (Ambion), and then purified using Ampure XP beads  
579 (Agencourt). The DNase-treated RNA (2 ug) underwent Ribozero treatment  
580 using an Epicentre Ribo-Zero Gold Kit (Human/Rat/Mouse) (Epicentre) and  
581 re-purified on Ampure XP beads. Successful RNA depletion was verified  
582 using a Qubit (Thermo Fisher Scientific) and an Agilent 2100 Bioanalyzer  
583 (Agilent) and all of the depleted RNA was used as input material for the  
584 ScriptSeq v2 RNA-Seq Library Preparation protocol. RNA was amplified for  
585 14 cycles and the libraries were purified on Ampure XP beads. Each library  
586 was quantified using Qubit and the size distribution was assessed using the  
587 AATI Fragment Analyser (Advanced Analytical). These final libraries were  
588 pooled in equimolar amounts using the Qubit and Fragment Analyser data.  
589 The quantity and quality of each pool was assessed by the Fragment  
590 Analyser and subsequently by qPCR using the Illumina Library Quantification  
591 Kit (KAPA Biosystems) on a Light Cycler LC480II (Roche) according to  
592 manufacturer's instructions. The template DNA was denatured according to  
593 the protocol described in the Illumina cBot User guide and loaded at 12 pM  
594 concentration. Sequencing was carried out on three lanes of an Illumina  
595 HiSeq 2500 with version 4 chemistry, generating 2 × 125 bp paired-end reads.

596

597 **Bioinformatics Analysis.** Briefly, base calling and de-multiplexing of indexed  
598 reads was performed using CASAVA version 1.8.2 (Illumina) to produce 30  
599 samples from the five lanes of sequence data in fastq format. The raw fastq  
600 files were trimmed to remove the Illumina adapter sequences using Cutadapt  
601 version 1.2.1 (69). The option “-O 3” was set so that the 3' end of any read  
602 that matched the adapter sequence by  $\geq 3$  bp was removed. The reads were  
603 further trimmed to remove low-quality bases using Sickle version 1.200 with a  
604 minimum window quality score of 20. After trimming, reads  $< 50$  bp were  
605 removed. If both reads from a pair passed this filter, each read was included  
606 in the R1 (forward reads) or R2 (reverse reads) file. If only one read of a read  
607 pair passed this filter, it was included in the R0 (unpaired reads) file. The  
608 reference genome used for alignment was the human reference genome  
609 assembly GRCh38. The reference sequence was downloaded from the  
610 Ensembl ftp site  
611 ([ftp://ftp.ensembl.org/pub/release77/fasta/homo\\_sapiens/dna/Homo\\_sapiens](ftp://ftp.ensembl.org/pub/release77/fasta/homo_sapiens/dna/Homo_sapiens)  
612 [GRCh38.dna\\_sm.primary\\_assembly.fa.gz](ftp://ftp.ensembl.org/pub/release77/fasta/homo_sapiens/dna/Homo_sapiens)). The reference annotation was  
613 also downloaded from the Ensembl ftp site (<ftp://ftp.ensembl.org/pub/release->  
614 [77/gtf/homo\\_sapiens/Homo\\_sapiens.GRCh38.77.gtf.gz](ftp://ftp.ensembl.org/pub/release-77/gtf/homo_sapiens/Homo_sapiens.GRCh38.77.gtf.gz)). The annotated file  
615 contained 63,152 genes. R1/R2 read pairs were mapped to the reference  
616 sequence using TopHat2 version 2.1.0 (70) that employs the mapper Bowtie2  
617 version 2.0.10 (71).

618

619 **Differential Gene Expression and Functional Analysis.** Mapped reads  
620 were further analyzed using EdgeR version 3.3 (72) to calculate normalized  
621 counts per million (CPM), identify differentially expressed genes between

622 infected and mock-infected conditions, and compare infected conditions with  
623 each other. Correlation and PCA analysis plots were created in RStudio.  
624 Heat-maps were generated using GENE-E (Broad Institute;  
625 <https://software.broadinstitute.org/GENE-E/>). IPA was used for gene ontology  
626 and pathway analysis. The *P* value associated with each identified canonical  
627 pathway was calculated by Fisher's Exact test (right-tailed). The presence of  
628 the 27 common canonical pathways was illustrated in a heat-map generated  
629 by hierarchical clustering using TM4-MeV (73).

630

631 **Identification of ZIKV variants.** Bowtie 2 (71) was used to determine the  
632 mean sequence coverage. Here, 12 of the 41 samples (including the  
633 inoculum) had a mean coverage >10 following alignment with the ZIKV  
634 reference genome (accession KJ776791) used in this study. The frequencies  
635 of minor variants were calculated using QuasiRecomb (74). Sequences of  
636 individual viral proteins were compared to the protein databank using the  
637 online NCBI Protein BLAST server  
638 (<https://blast.ncbi.nlm.nih.gov/Blast.cgi?PAGE=Proteins>).

639

640 **Author contributions**

641 FML, DAM, JAH and LFPN designed the study. FML, DL, DAM, JAH and  
642 LFPN wrote the manuscript. FML, CTK, CLYP, JJLT, XL, WXY and YXF  
643 performed the experiments. FML, DL, XL, YXF, BL, NYR, DAM, JAH and  
644 LFPN analysed the data. All other authors were involved in sample collection,  
645 processing and analysis, and/or logistical support. All authors read and  
646 approved the final manuscript.

647 **Acknowledgements**

648 The authors would like to thank Siti Naqiah Amrun, Yiu-Wing Kam, Jonathan  
649 Cox, Yi-Hao Chan, Guillaume Carissimo, Farhana Abu Bakar, Nicholas Q.R.  
650 Kng, Kia-Joo Puan and Nurhashikin Binte Yusof from SIgN for their help in the  
651 processing of patient samples. The authors also thank Linda Kay Lee from the  
652 Communicable Diseases Centre and Ivy Low, Seri Mustafah and Anis Larbi  
653 from the SIgN Flow Cytometry team for their assistance. The authors are  
654 grateful to all patients and healthy volunteers for their participation in the  
655 study. Finally, the authors would like to thank Laurent Rénia and Insight  
656 Editing London for comments and proofreading the manuscript prior to  
657 submission. This work was supported by core research grants provided to the  
658 Singapore Immunology Network (SIgN) by the Biomedical Research Council  
659 (BMRC) and by the BMRC A\*STAR-led Zika Virus Consortium Fund [project  
660 number: 15/1/82/27/001], Agency for Science, Technology and Research  
661 (A\*STAR), Singapore. This work was also supported by funds provided by the  
662 Medical Research Council (MRC) [project number: MC\_PC\_15094], and by  
663 the HPRU in Emerging and Zoonotic Infections Cross NIHR Strategic  
664 Research Fund [project number: ZLKN\_11447], United Kingdom. The views  
665 expressed are those of the author(s) and not necessarily those of the  
666 A\*STAR, NHS, the NIHR, the Department of Health or PHE.

667 **References**

- 668 1. Korzeniewski, K, Juszczak, D , Zwolinska, E. Zika - another threat on  
669 the epidemiological map of the world. *Int Marit Health*. 2016;67(1):31-7.
- 670 2. Dick, GW, Kitchen, SF , Haddock, AJ. Zika virus. I. Isolations and  
671 serological specificity. *Trans R Soc Trop Med Hyg*. 1952;46(5):509-20.
- 672 3. Duffy, MR et al. Zika virus outbreak on Yap Island, Federated States of  
673 Micronesia. *N Engl J Med*. 2009;360(24):2536-43.
- 674 4. Cao-Lormeau, VM et al. Guillain-Barre Syndrome outbreak associated  
675 with Zika virus infection in French Polynesia: a case-control study.  
676 *Lancet*. 2016;387(10027):1531-9.
- 677 5. Brasil, P et al. Zika Virus Infection in Pregnant Women in Rio de  
678 Janeiro - Preliminary Report. *N Engl J Med*. 2016  
679 doi:10.1056/NEJMoa1602412.
- 680 6. Foo, SS et al. Asian Zika virus strains target CD14+ blood monocytes  
681 and induce M2-skewed immunosuppression during pregnancy. *Nat*  
682 *Microbiol*. 2017 doi:10.1038/s41564-017-0016-3.
- 683 7. Lum, FM et al. Sensitive detection of Zika virus antigen in patients'  
684 whole blood as an alternative diagnostic approach. *J Infect Dis*. 2017  
685 doi:10.1093/infdis/jix276.
- 686 8. Lum, FM et al. Zika Virus Infects Human Fetal Brain Microglia and  
687 Induces Inflammation. *Clin Infect Dis*. 2017;64(7):914-20.

- 688 9. Michlmayr, D, Andrade, P, Gonzalez, K, Balmaseda, A , Harris, E.  
689 CD14+CD16+ monocytes are the main target of Zika virus infection in  
690 peripheral blood mononuclear cells in a paediatric study in Nicaragua.  
691 *Nat Microbiol.* 2017 doi:10.1038/s41564-017-0035-0.
- 692 10. Liu, X et al. Transcriptomic signatures differentiate survival from fatal  
693 outcomes in humans infected with Ebola virus. *Genome Biol.*  
694 2017;18(1):4.
- 695 11. Bowen, JR et al. Zika Virus Antagonizes Type I Interferon Responses  
696 during Infection of Human Dendritic Cells. *PLoS Pathog.*  
697 2017;13(2):e1006164.
- 698 12. Carroll, MW et al. Temporal and spatial analysis of the 2014-2015  
699 Ebola virus outbreak in West Africa. *Nature.* 2015;524(7563):97-101.
- 700 13. Dowall, SD et al. Elucidating variations in the nucleotide sequence of  
701 Ebola virus associated with increasing pathogenicity. *Genome Biol.*  
702 2014;15(11):540.
- 703 14. Singapore Zika Study, G. Outbreak of Zika virus infection in Singapore:  
704 an epidemiological, entomological, virological, and clinical analysis.  
705 *Lancet Infect Dis.* 2017;17(8):813-21.
- 706 15. Montaldo, E et al. Human NK cell receptors/markers: a tool to analyze  
707 NK cell development, subsets and function. *Cytometry A.*  
708 2013;83(8):702-13.



- 709 16. Yu, J et al. CD94 surface density identifies a functional intermediary  
710 between the CD56bright and CD56dim human NK-cell subsets. *Blood*.  
711 2010;115(2):274-81.
- 712 17. Fogel, LA, Sun, MM, Geurs, TL, Carayannopoulos, LN , French, AR.  
713 Markers of nonselective and specific NK cell activation. *J Immunol*.  
714 2013;190(12):6269-76.
- 715 18. Michel, T, Hentges, F , Zimmer, J. Consequences of the crosstalk  
716 between monocytes/macrophages and natural killer cells. *Front*  
717 *Immunol*. 2012;3:403.
- 718 19. Marcais, A et al. The metabolic checkpoint kinase mTOR is essential  
719 for IL-15 signaling during the development and activation of NK cells.  
720 *Nat Immunol*. 2014;15(8):749-57.
- 721 20. Kam, YW et al. Specific Biomarkers Associated With Neurological  
722 Complications and Congenital Central Nervous System Abnormalities  
723 From Zika Virus-Infected Patients in Brazil. *J Infect Dis*.  
724 2017;216(2):172-81.
- 725 21. El Costa, H et al. ZIKA virus reveals broad tissue and cell tropism  
726 during the first trimester of pregnancy. *Sci Rep*. 2016;6:35296.
- 727 22. Hamel, R et al. Biology of Zika Virus Infection in Human Skin Cells. *J*  
728 *Virol*. 2015;89(17):8880-96.
- 729 23. Quicke, KM et al. Zika Virus Infects Human Placental Macrophages.  
730 *Cell Host Microbe*. 2016;20(1):83-90.

- 731 24. Gordon, S, Pluddemann, A , Martinez Estrada, F. Macrophage  
732 heterogeneity in tissues: phenotypic diversity and functions. *Immunol*  
733 *Rev.* 2014;262(1):36-55.
- 734 25. Gordon, S , Taylor, PR. Monocyte and macrophage heterogeneity. *Nat*  
735 *Rev Immunol.* 2005;5(12):953-64.
- 736 26. Martinez, FO, Gordon, S, Locati, M , Mantovani, A. Transcriptional  
737 profiling of the human monocyte-to-macrophage differentiation and  
738 polarization: new molecules and patterns of gene expression. *J*  
739 *Immunol.* 2006;177(10):7303-11.
- 740 27. Ploeger, DT et al. Cell plasticity in wound healing: paracrine factors of  
741 M1/ M2 polarized macrophages influence the phenotypical state of  
742 dermal fibroblasts. *Cell Commun Signal.* 2013;11(1):29.
- 743 28. Italiani, P , Boraschi, D. From Monocytes to M1/M2 Macrophages:  
744 Phenotypical vs. Functional Differentiation. *Front Immunol.* 2014;5:514.
- 745 29. Grubaugh, ND et al. Genomic epidemiology reveals multiple  
746 introductions of Zika virus into the United States. *Nature.* 2017  
747 doi:10.1038/nature22400.
- 748 30. Rodpothong, P , Auewarakul, P. Viral evolution and transmission  
749 effectiveness. *World J Virol.* 2012;1(5):131-4.
- 750 31. Mamrut, S et al. Integrative analysis of methylome and transcriptome in  
751 human blood identifies extensive sex- and immune cell-specific  
752 differentially methylated regions. *Epigenetics.* 2015;10(10):943-57.

- 753 32. Wong, KL et al. Gene expression profiling reveals the defining features  
754 of the classical, intermediate, and nonclassical human monocyte  
755 subsets. *Blood*. 2011;118(5):e16-31.
- 756 33. Carrasco, L. The inhibition of cell functions after viral infection. A  
757 proposed general mechanism. *FEBS Lett*. 1977;76(1):11-5.
- 758 34. Randall, RE , Goodbourn, S. Interferons and viruses: an interplay  
759 between induction, signalling, antiviral responses and virus  
760 countermeasures. *J Gen Virol*. 2008;89(Pt 1):1-47.
- 761 35. Lunemann, JD. Epstein-Barr virus in multiple sclerosis: a continuing  
762 conundrum. *Neurology*. 2012;78(1):11-2.
- 763 36. Tucker, WG , Andrew Paskauskas, R. The MSMV hypothesis: measles  
764 virus and multiple sclerosis, etiology and treatment. *Med Hypotheses*.  
765 2008;71(5):682-9.
- 766 37. Robertson, MJ. Role of chemokines in the biology of natural killer cells.  
767 *J Leukoc Biol*. 2002;71(2):173-83.
- 768 38. Thapa, M, Welner, RS, Pelayo, R , Carr, DJ. CXCL9 and CXCL10  
769 expression are critical for control of genital herpes simplex virus type 2  
770 infection through mobilization of HSV-specific CTL and NK cells to the  
771 nervous system. *J Immunol*. 2008;180(2):1098-106.
- 772 39. Warren, HS , Smyth, MJ. NK cells and apoptosis. *Immunol Cell Biol*.  
773 1999;77(1):64-75.

- 774 40. Kobayashi, M et al. Identification and purification of natural killer cell  
775 stimulatory factor (NKSF), a cytokine with multiple biologic effects on  
776 human lymphocytes. *J Exp Med.* 1989;170(3):827-45.
- 777 41. Liu, J et al. Interleukin-12: an update on its immunological activities,  
778 signaling and regulation of gene expression. *Curr Immunol Rev.*  
779 2005;1(2):119-37.
- 780 42. French, AR, Holroyd, EB, Yang, L, Kim, S , Yokoyama, WM. IL-18 acts  
781 synergistically with IL-15 in stimulating natural killer cell proliferation.  
782 *Cytokine.* 2006;35(5-6):229-34.
- 783 43. Takeda, K et al. Defective NK cell activity and Th1 response in IL-18-  
784 deficient mice. *Immunity.* 1998;8(3):383-90.
- 785 44. Kastelein, RA, Hunter, CA , Cua, DJ. Discovery and biology of IL-23  
786 and IL-27: related but functionally distinct regulators of inflammation.  
787 *Annu Rev Immunol.* 2007;25:221-42.
- 788 45. Matsui, M et al. Interleukin-27 activates natural killer cells and  
789 suppresses NK-resistant head and neck squamous cell carcinoma  
790 through inducing antibody-dependent cellular cytotoxicity. *Cancer Res.*  
791 2009;69(6):2523-30.
- 792 46. van de Wetering, D, de Paus, RA, van Dissel, JT , van de Vosse, E. IL-  
793 23 modulates CD56+/CD3- NK cell and CD56+/CD3+ NK-like T cell  
794 function differentially from IL-12. *Int Immunol.* 2009;21(2):145-53.

- 795 47. Kim, TJ et al. Homotypic NK cell-to-cell communication controls  
796 cytokine responsiveness of innate immune NK cells. *Sci Rep.*  
797 2014;4:7157.
- 798 48. Krylova, NV, Smolina, TP , Leonova, GN. Molecular Mechanisms of  
799 Interaction Between Human Immune Cells and Far Eastern Tick-Borne  
800 Encephalitis Virus Strains. *Viral Immunol.* 2015;28(5):272-81.
- 801 49. Gotlieb, N et al. The misleading nature of in vitro and ex vivo findings in  
802 studying the impact of stress hormones on NK cell cytotoxicity. *Brain*  
803 *Behav Immun.* 2015;45:277-86.
- 804 50. Notario, L, Alari-Pahissa, E, de Molina, A , Lauzurica, P. CD69  
805 Deficiency Enhances the Host Response to Vaccinia Virus Infection  
806 through Altered NK Cell Homeostasis. *J Virol.* 2016;90(14):6464-74.
- 807 51. Sellers, RS, Clifford, CB, Treuting, PM , Brayton, C. Immunological  
808 variation between inbred laboratory mouse strains: points to consider in  
809 phenotyping genetically immunomodified mice. *Vet Pathol.*  
810 2012;49(1):32-43.
- 811 52. Cugola, FR et al. The Brazilian Zika virus strain causes birth defects in  
812 experimental models. *Nature.* 2016;534(7606):267-71.
- 813 53. Gaucher, D et al. Yellow fever vaccine induces integrated multilineage  
814 and polyfunctional immune responses. *J Exp Med.* 2008;205(13):3119-  
815 31.

- 816 54. Morrison, BE, Park, SJ, Mooney, JM , Mehrad, B. Chemokine-  
817 mediated recruitment of NK cells is a critical host defense mechanism  
818 in invasive aspergillosis. *J Clin Invest.* 2003;112(12):1862-70.
- 819 55. Eubank, TD, Galloway, M, Montague, CM, Waldman, WJ , Marsh, CB.  
820 M-CSF induces vascular endothelial growth factor production and  
821 angiogenic activity from human monocytes. *J Immunol.*  
822 2003;171(5):2637-43.
- 823 56. Kuroda, T et al. Monocyte chemoattractant protein-1 transfection  
824 induces angiogenesis and tumorigenesis of gastric carcinoma in nude  
825 mice via macrophage recruitment. *Clin Cancer Res.* 2005;11(21):7629-  
826 36.
- 827 57. Marumo, T, Schini-Kerth, VB , Busse, R. Vascular endothelial growth  
828 factor activates nuclear factor-kappaB and induces monocyte  
829 chemoattractant protein-1 in bovine retinal endothelial cells. *Diabetes.*  
830 1999;48(5):1131-7.
- 831 58. Conti, P et al. Activation of human natural killer cells by  
832 lipopolysaccharide and generation of interleukin-1 alpha, beta, tumour  
833 necrosis factor and interleukin-6. Effect of IL-1 receptor antagonist.  
834 *Immunology.* 1991;73(4):450-6.
- 835 59. Park, JY et al. IL-15-induced IL-10 increases the cytolytic activity of  
836 human natural killer cells. *Mol Cells.* 2011;32(3):265-72.
- 837 60. Metcalfe, SM. LIF in the regulation of T-cell fate and as a potential  
838 therapeutic. *Genes Immun.* 2011;12(3):157-68.

- 839 61. Wolk, K, Kunz, S, Asadullah, K , Sabat, R. Cutting edge: immune cells  
840 as sources and targets of the IL-10 family members? *J Immunol.*  
841 2002;168(11):5397-402.
- 842 62. Zhang, Q, Putheti, P, Zhou, Q, Liu, Q , Gao, W. Structures and  
843 biological functions of IL-31 and IL-31 receptors. *Cytokine Growth*  
844 *Factor Rev.* 2008;19(5-6):347-56.
- 845 63. Elong Ngono, A et al. Mapping and Role of the CD8+ T Cell Response  
846 During Primary Zika Virus Infection in Mice. *Cell Host Microbe.*  
847 2017;21(1):35-46.
- 848 64. Kerdiles, Y, Ugolini, S , Vivier, E. T cell regulation of natural killer cells.  
849 *J Exp Med.* 2013;210(6):1065-8.
- 850 65. Baronti, C et al. Complete coding sequence of zika virus from a French  
851 polynesia outbreak in 2013. *Genome Announc.* 2014;2(3).
- 852 66. Balm, MN et al. A diagnostic polymerase chain reaction assay for Zika  
853 virus. *J Med Virol.* 2012;84(9):1501-5.
- 854 67. Wu, D et al. Chikungunya outbreak in Guangdong Province, China,  
855 2010. *Emerging infectious diseases.* 2012;18(3):493-5.
- 856 68. Bosworth, A et al. A comparison of host gene expression signatures  
857 associated with infection in vitro by the Makona and Ecran (Mayinga)  
858 variants of Ebola virus. *Sci Rep.* 2017;7:43144.
- 859 69. Tang, H et al. Zika Virus Infects Human Cortical Neural Progenitors  
860 and Attenuates Their Growth. *Cell Stem Cell.* 2016;18(5):587-90.

- 861 70. Kim, D et al. TopHat2: accurate alignment of transcriptomes in the  
862 presence of insertions, deletions and gene fusions. *Genome Biol.*  
863 2013;14(4):R36.
- 864 71. Langmead, B , Salzberg, SL. Fast gapped-read alignment with Bowtie  
865 2. *Nat Methods.* 2012;9(4):357-9.
- 866 72. Robinson, MD, McCarthy, DJ , Smyth, GK. edgeR: a Bioconductor  
867 package for differential expression analysis of digital gene expression  
868 data. *Bioinformatics.* 2010;26(1):139-40.
- 869 73. Saeed, AI et al. TM4: a free, open-source system for microarray data  
870 management and analysis. *Biotechniques.* 2003;34(2):374-8.
- 871 74. Beerenwinkel, N , Zagordi, O. Ultra-deep sequencing for the analysis of  
872 viral populations. *Curr Opin Virol.* 2011;1(5):413-8.  
873



**A**

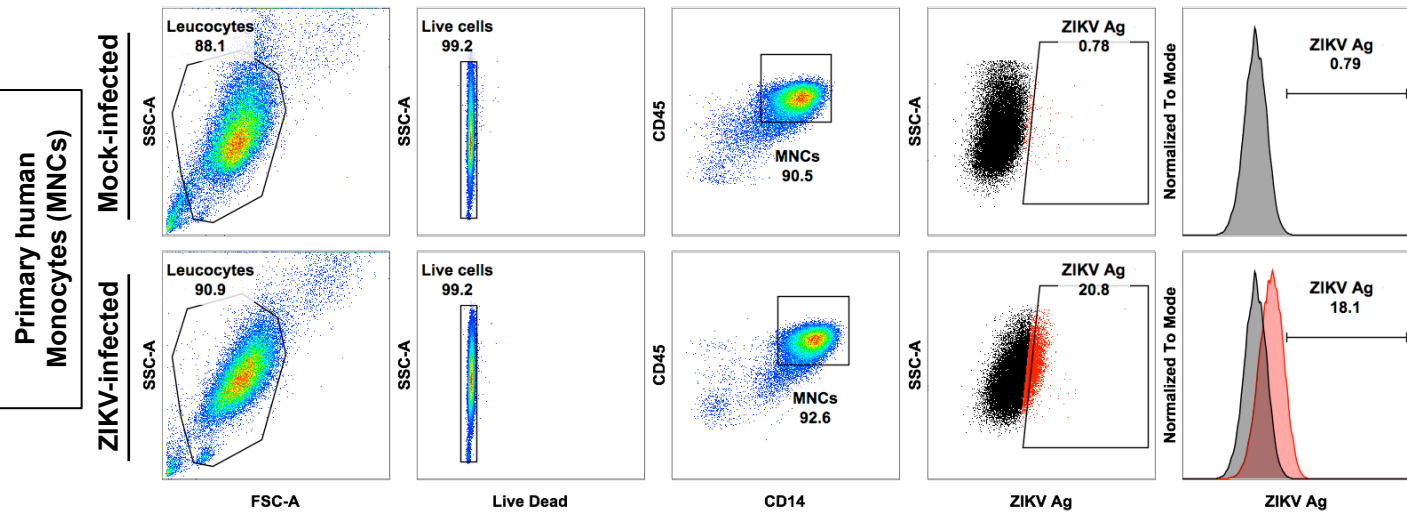

**B**

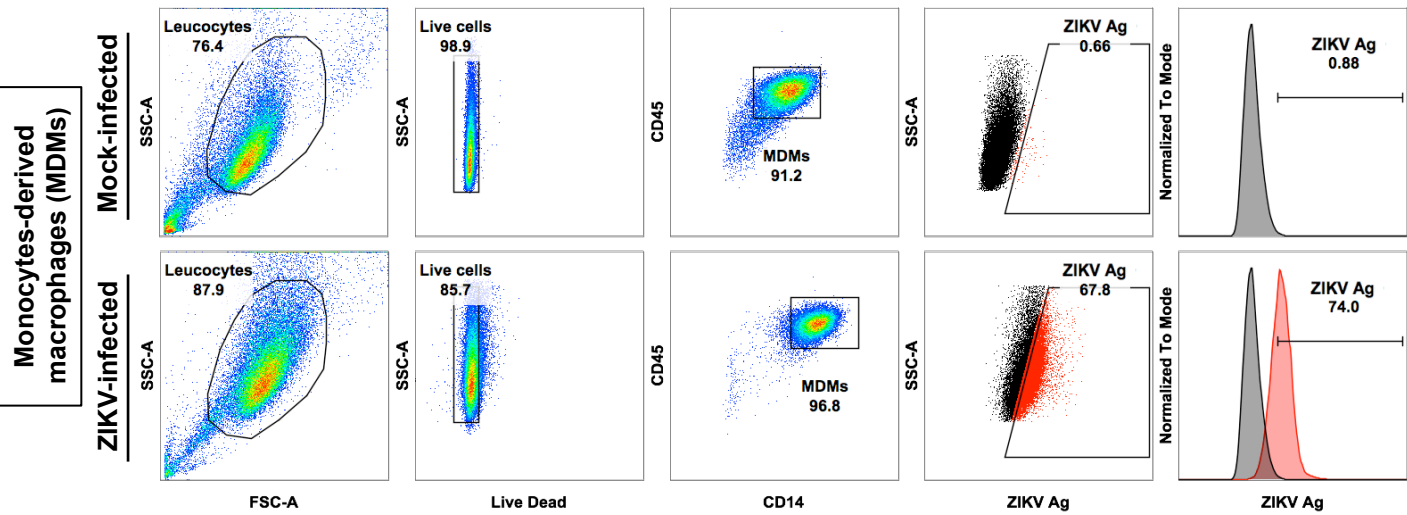

**C**

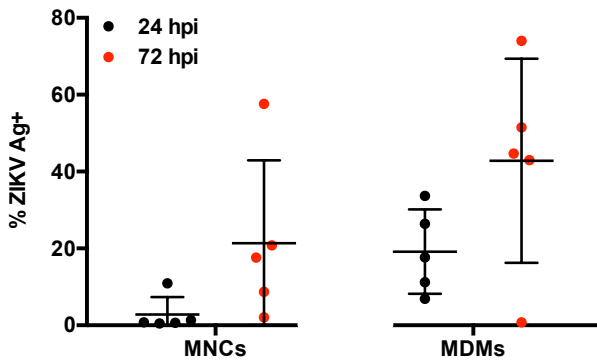

**D**

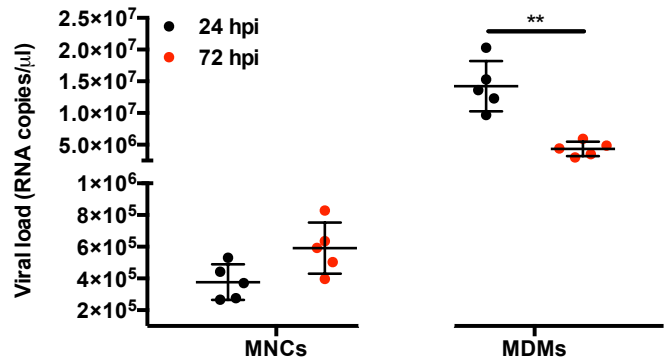

**Figure 1: Primary human MNCs and MDMs are targets of ZIKV infection.** Isolated human primary MNCs and MDMs ( $2 \times 10^6$  cells each) were infected with ZIKV at MOI 10 and harvested at 24 and 72 hpi. Flow cytometry gating on (A) monocytes (MNCs) and (B) MDMs. Gating for positive infection was set using the mock-infected samples. For the dot plots, cells positive for ZIKV Ag are shown in red. For the histogram, ZIKV-infected samples (red) were overlaid on mock-infected samples (black). Compiled results for (C) infection (ZIKV Ag) and (D) viral load detected in MNCs and MDMs obtained from five healthy donors. All data are presented as mean  $\pm$  SD. \* $P < 0.05$ , by Mann Whitney  $U$  test, two tailed. Viral load data was not statistically significant between 24 and 72 hpi in MNCs by Mann Whitney  $U$  test, two tailed. Abbreviations: hpi, hours post-infection; MDM, monocyte-derived macrophage; MNC, monocyte; ZIKV, Zika virus; Ag, antigen.

**A**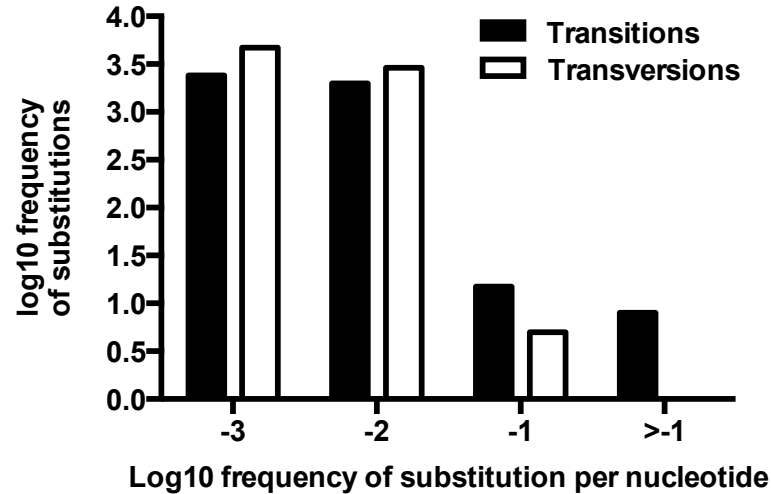**B**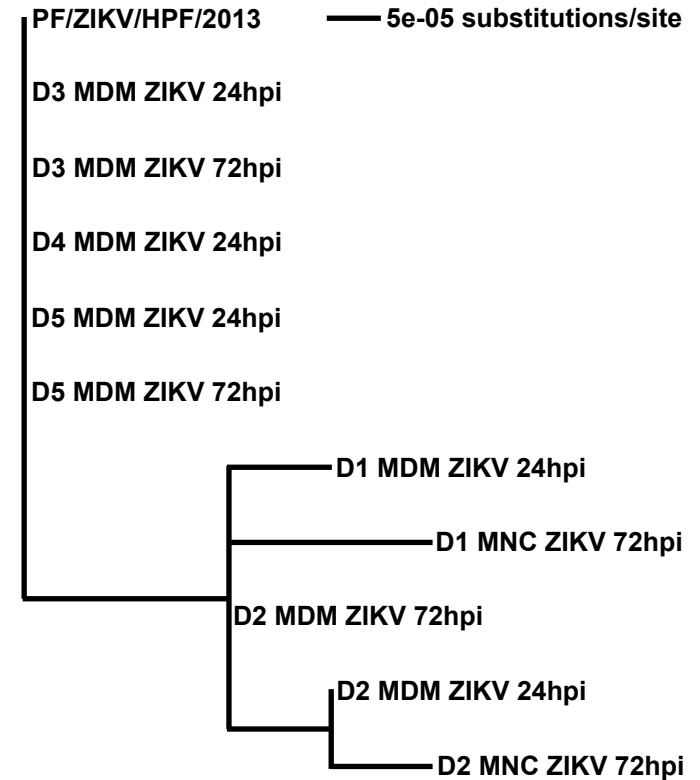

**Figure 2: Phylogenetic analyses based on sample consensus sequences.** (A) Frequency of ZIKV minor variants (transitions and transversions) recovered from infected human primary MNCs and MDMs isolated from five donors. Bin -3 is where  $\leq 1/1000$  reads show a specific change at an individual nucleotide position. Bin -2 is  $> 1/1000$  and  $\leq 1/100$  reads showing a difference. Bin -1 is  $> 1/100$  and  $\leq 1/10$  reads and Bin  $> -1$  is  $> 1/10$  reads showing a change up to a logical limit of just under  $\frac{1}{2}$ . (B) Phylogenetic tree generated from the alignment of consensus sequences of ZIKV RNA recovered from the same samples as described in (A). All samples included in the tree had a mean sequence coverage  $> 10$  at each nucleotide position. PF/ZIKV/HPF/2013 is the virus strain used for infection and denoted as the reference sample in this analysis. Abbreviations: hpi, hours post-infection; MDM, monocyte-derived macrophage; MNC, monocyte; ZIKV, Zika virus.

**A**

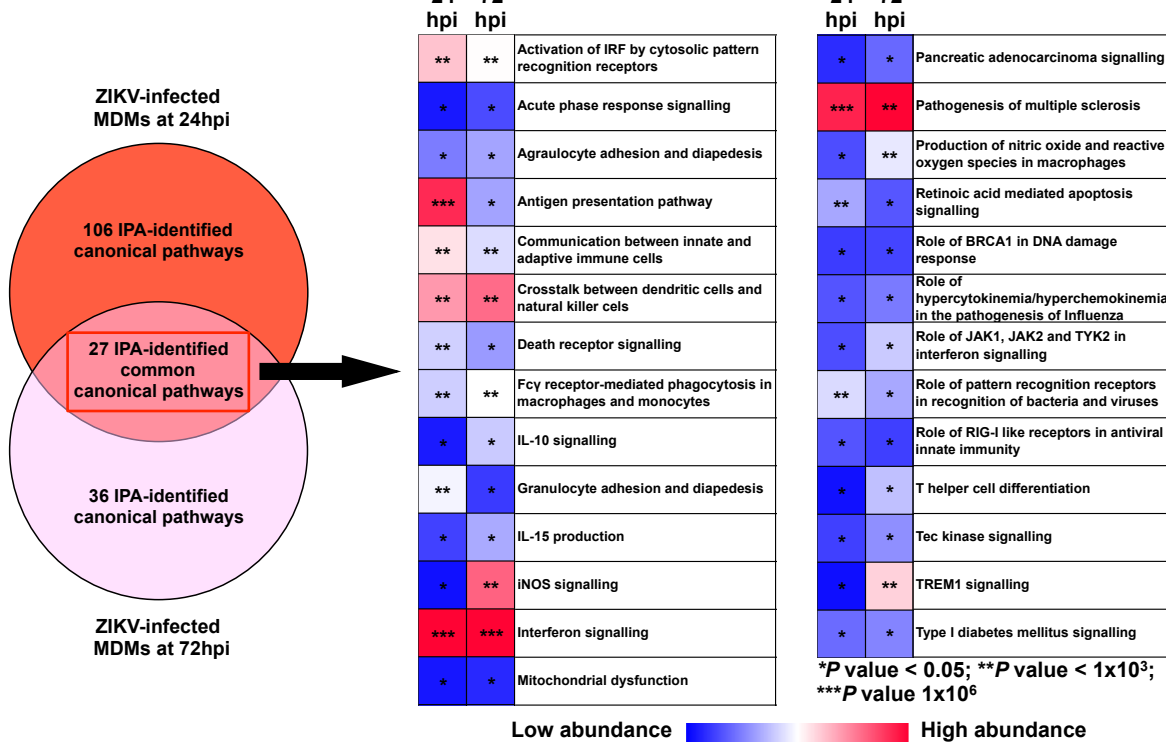

**B**

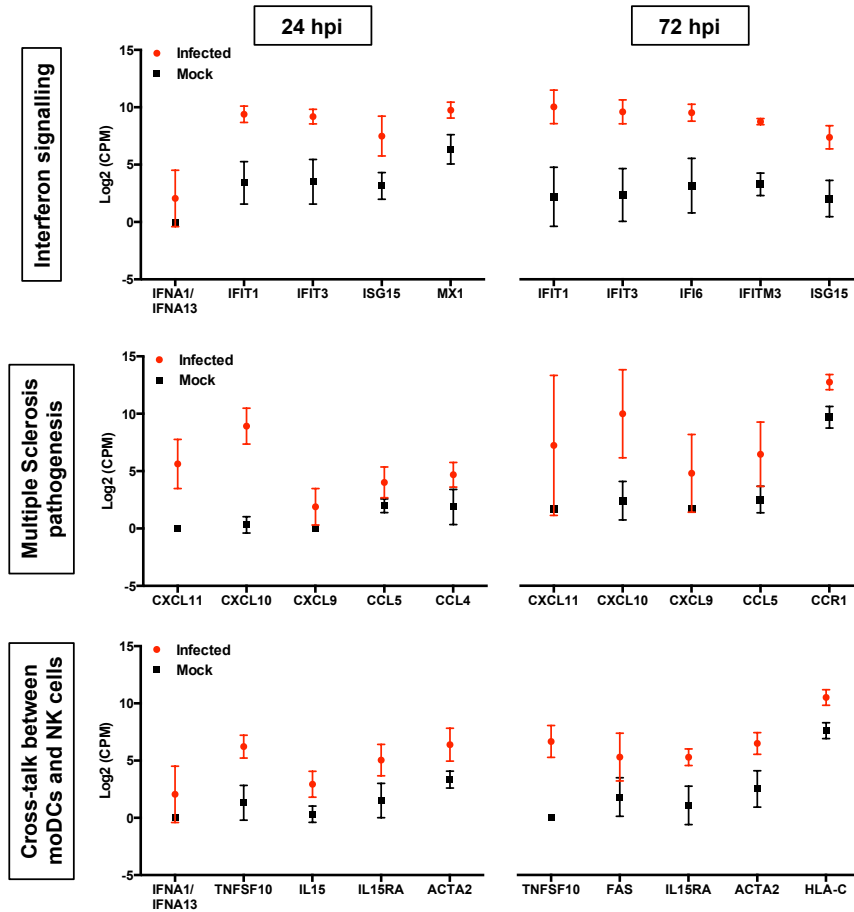

**Figure 3: Transcriptomic profiling of host cells during ZIKV infection.** Primary human MNCs and MDMs ( $2 \times 10^6$  cells per infection) were infected with ZIKV at MOI 10 and harvested at 24 and 72 hpi for transcriptomic analysis by RNA-seq and then compared to mock-infected controls. **(A)** Venn-diagram illustrating the proportion of up-regulated signaling pathways identified by IPA in ZIKV-infected MDMs. Up-regulation intensity of the 27 common canonical pathways are shown in a heat-map. Stars within the boxes represent the calculated  $P$  values associated with each identified pathway, compared to the mock-infected samples. **(B)** The five most up-regulated genes within the top three signaling pathways at 24 and 72 hpi are shown: Interferon pathway, multiple sclerosis pathway and crosstalk between moDCs and NK cells. Data presented were obtained from a total of five donors. Abbreviations: hpi, hours post-infection; NK, natural killer; IPA, ingenuity pathway analysis; MDM, monocyte-derived macrophage; MNC, monocyte; moDCs, monocyte-derived dendritic cells; ZIKV, Zika virus.

**A**

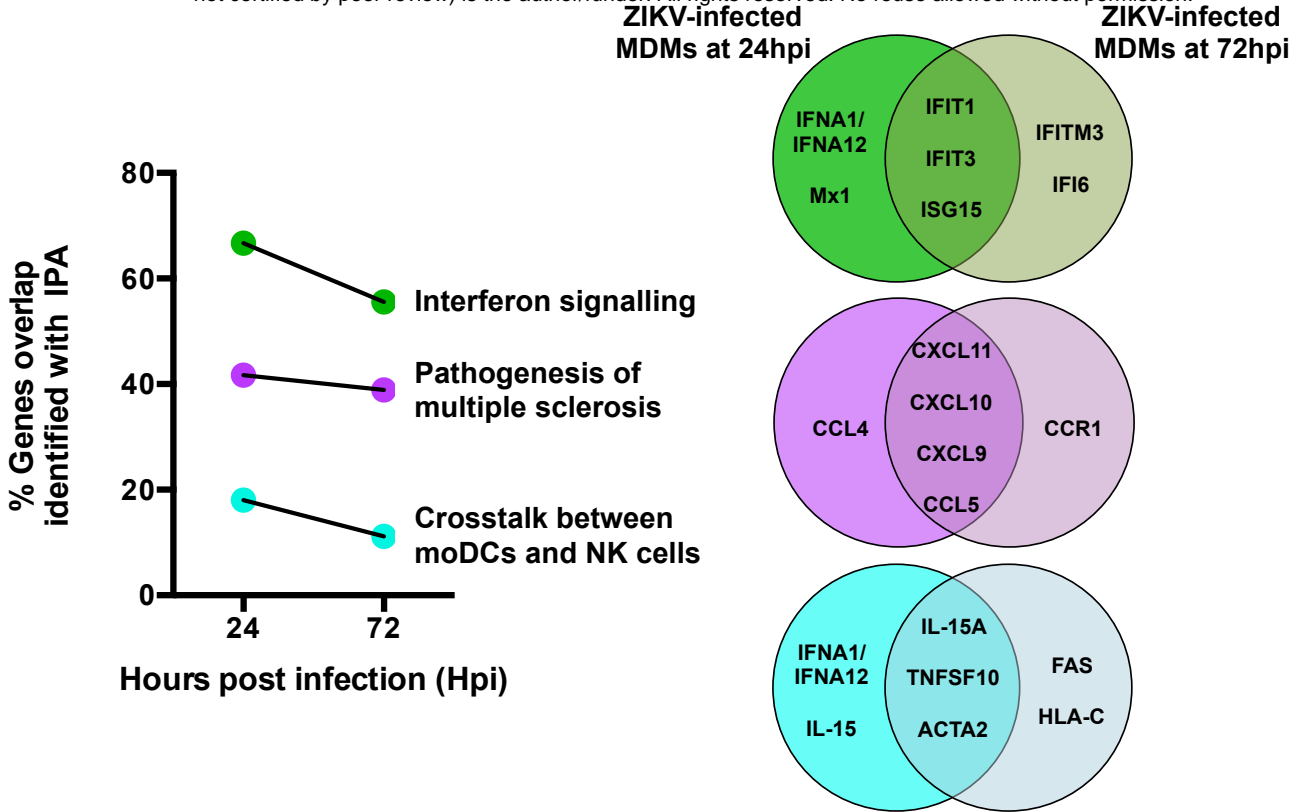

**B**

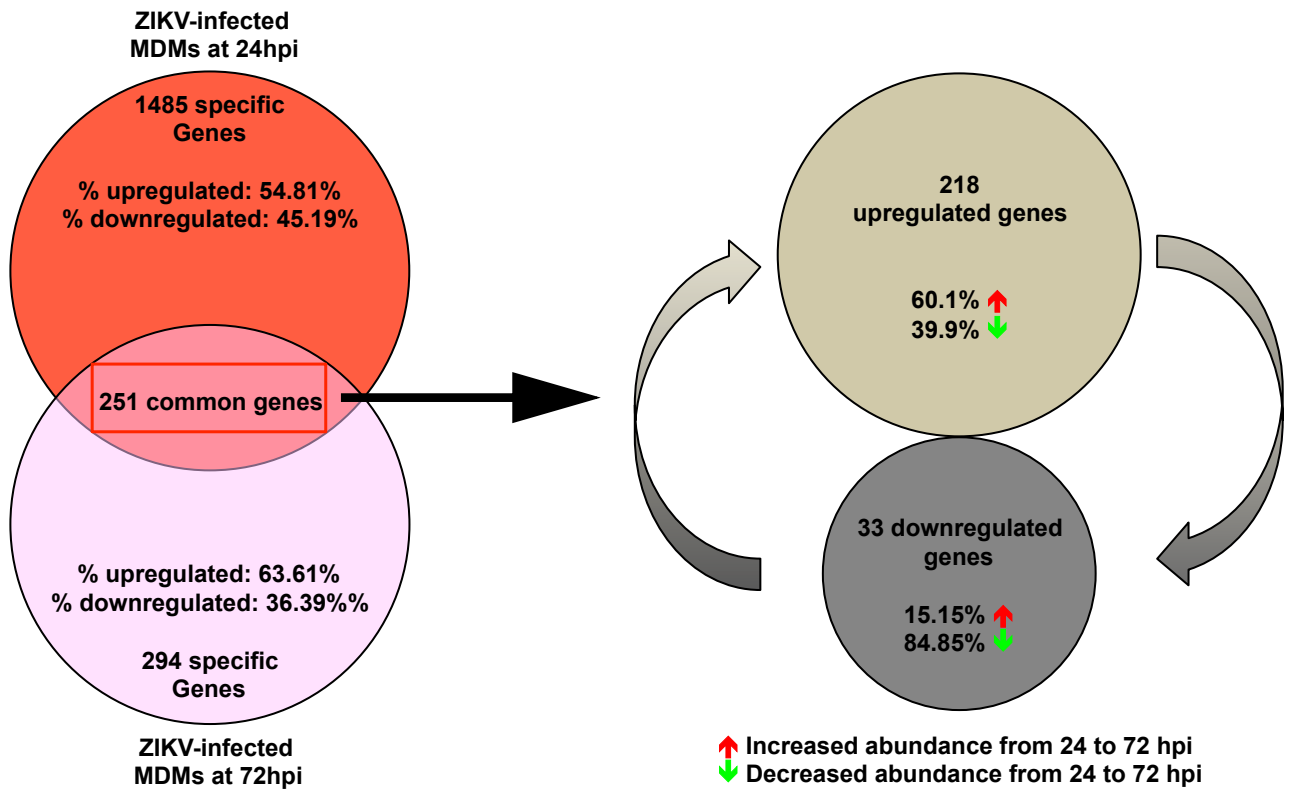

**Figure 4: Transition of the host cellular response over the course of ZIKV infection.** The host cellular response was analyzed and investigated by RNA-sequencing and significant transcriptomic differences were identified. **(A)** Transitional analysis (% genes overlapping) of the top three common canonical signaling pathways was determined using IPA of infected MDMs. Venn diagrams indicate the top five common and time-point specific genes associated with each canonical pathway. **(B)** Proportion of common and differentially expressed genes within ZIKV-infected MDMs at 24 and 72 hpi. Data presented were obtained from a total of five donors. Abbreviations: moDCs, monocyte-derived dendritic cells; hpi, hours post-infection; IPA, ingenuity pathway analysis; ZIKV, Zika virus; MDM, monocyte-derived macrophage.

**A**

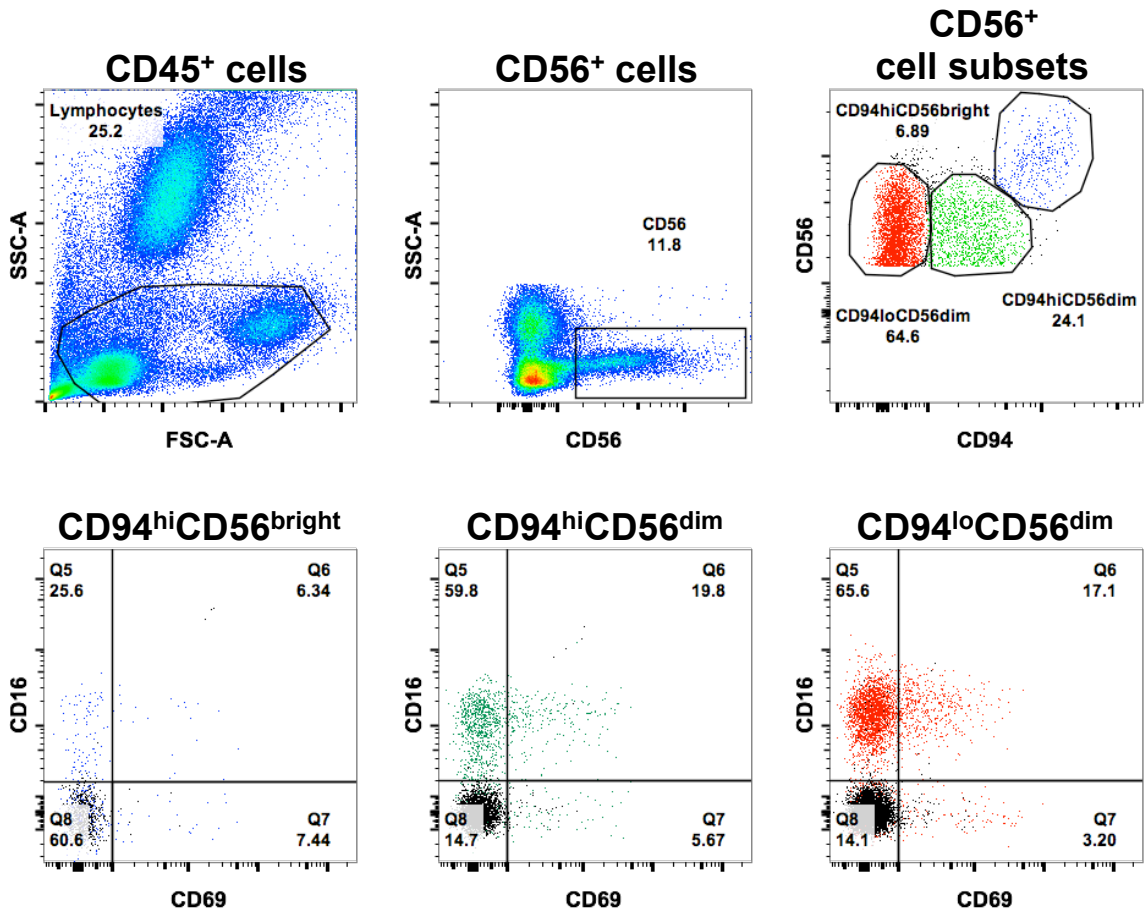

**B**

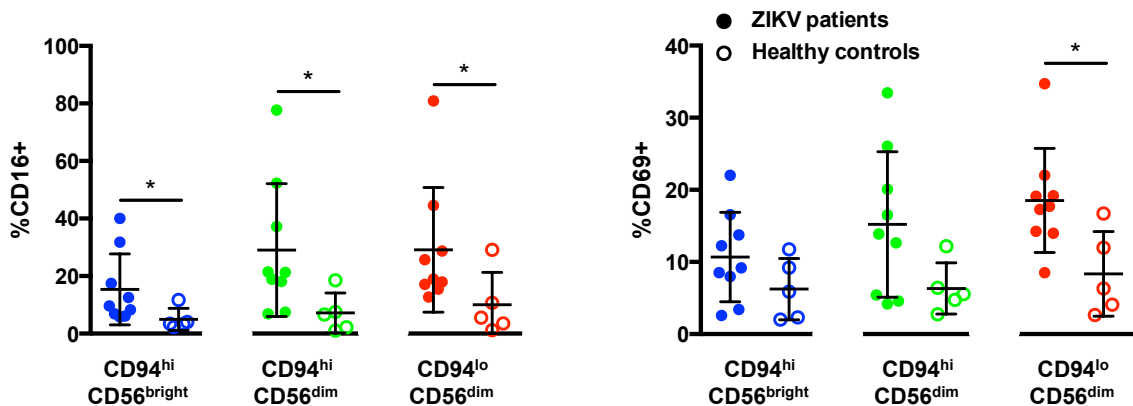

**Figure 5: Activation of CD56<sup>+</sup> cells in patients infected with ZIKV.** (A) Gating strategy of CD56<sup>+</sup> cell subsets and their expression of CD16 and CD69. CD56<sup>+</sup> cells were first gated from CD45<sup>+</sup> lymphocytes from peripheral blood mononuclear cells isolated from patients. These populations were further gated into three populations based on the expression of surface marker CD94: CD94<sup>hi</sup>CD56<sup>bright</sup> cells (blue), CD94<sup>hi</sup>CD56<sup>dim</sup> (green) and CD94<sup>lo</sup>CD56<sup>dim</sup> (red). The data presented correspond to a representative patient infected with ZIKV. Cells from a healthy control are overlaid and depicted as the black population (Q8). (B) Compiled data on the percentage of gated subsets that are positive for CD16 (Q5 and Q6) and CD69 (Q6 and Q7). Patients (n=9) are depicted as filled circles, and healthy controls (n=5) are depicted as clear circles. All data are presented as mean ± SD. \**P* < 0.05, by Mann Whitney *U* test, two tailed. Abbreviations: NK, natural killer; ZIKV, Zika virus.

**A**

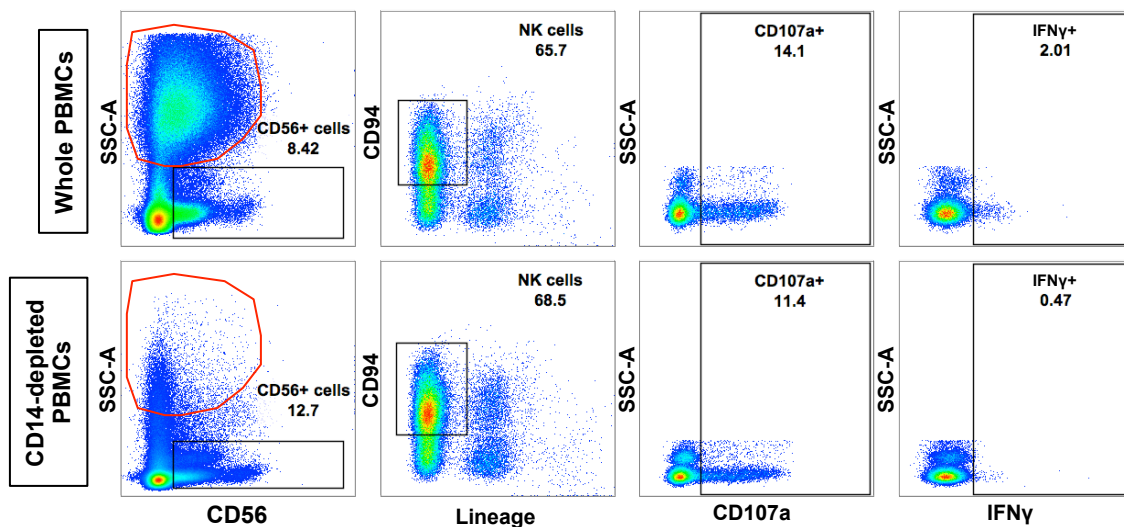

**B**

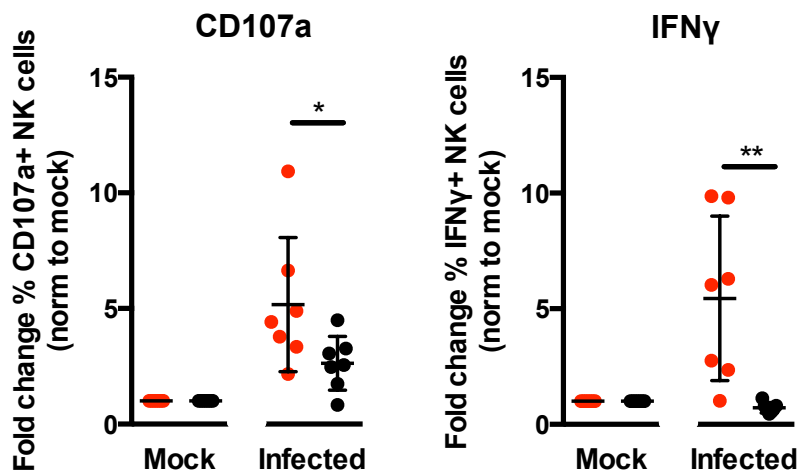

**C**

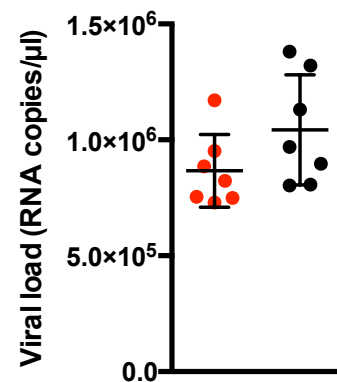

● Whole PBMCs ● CD14-depleted PBMCs

**Figure 6: Role of monocytes in NK-cell activity.** Full PBMCs and CD14-depleted PBMCs ( $2 \times 10^6$  cells per infection) were infected with Zika virus (ZIKV) at MOI 10 and harvested at 36 hpi. **(A)** Gating strategy of CD94<sup>+</sup>CD56<sup>+</sup>Lineage<sup>+</sup> NK cells and their expression of CD69, CD107a and IFN $\gamma$ . Plots from one representative donor are shown. The red circle indicates the presence or absence of CD14<sup>+</sup> monocytes. **(B)** Compiled percentages of CD107a and IFN $\gamma$ -positive NK cells (depicted in **(A)**) as normalized to the respective mock sample. **(C)** Viral load in the infected cells. Data shown were derived from seven donors. Lineage markers CD3, CD19, CD20 and CD14 have been included to rule out the presence of non-NK cells. All data are presented as mean  $\pm$  SD. \* $P < 0.05$ , \*\* $P < 0.01$ , by Mann Whitney  $U$  test, two tailed. Viral load data was not statistically significant between the two conditions by Mann Whitney  $U$  test, two tailed. Abbreviations; NK, natural killer; PMBC, peripheral blood mononuclear cell; hpi, hours post-infection.

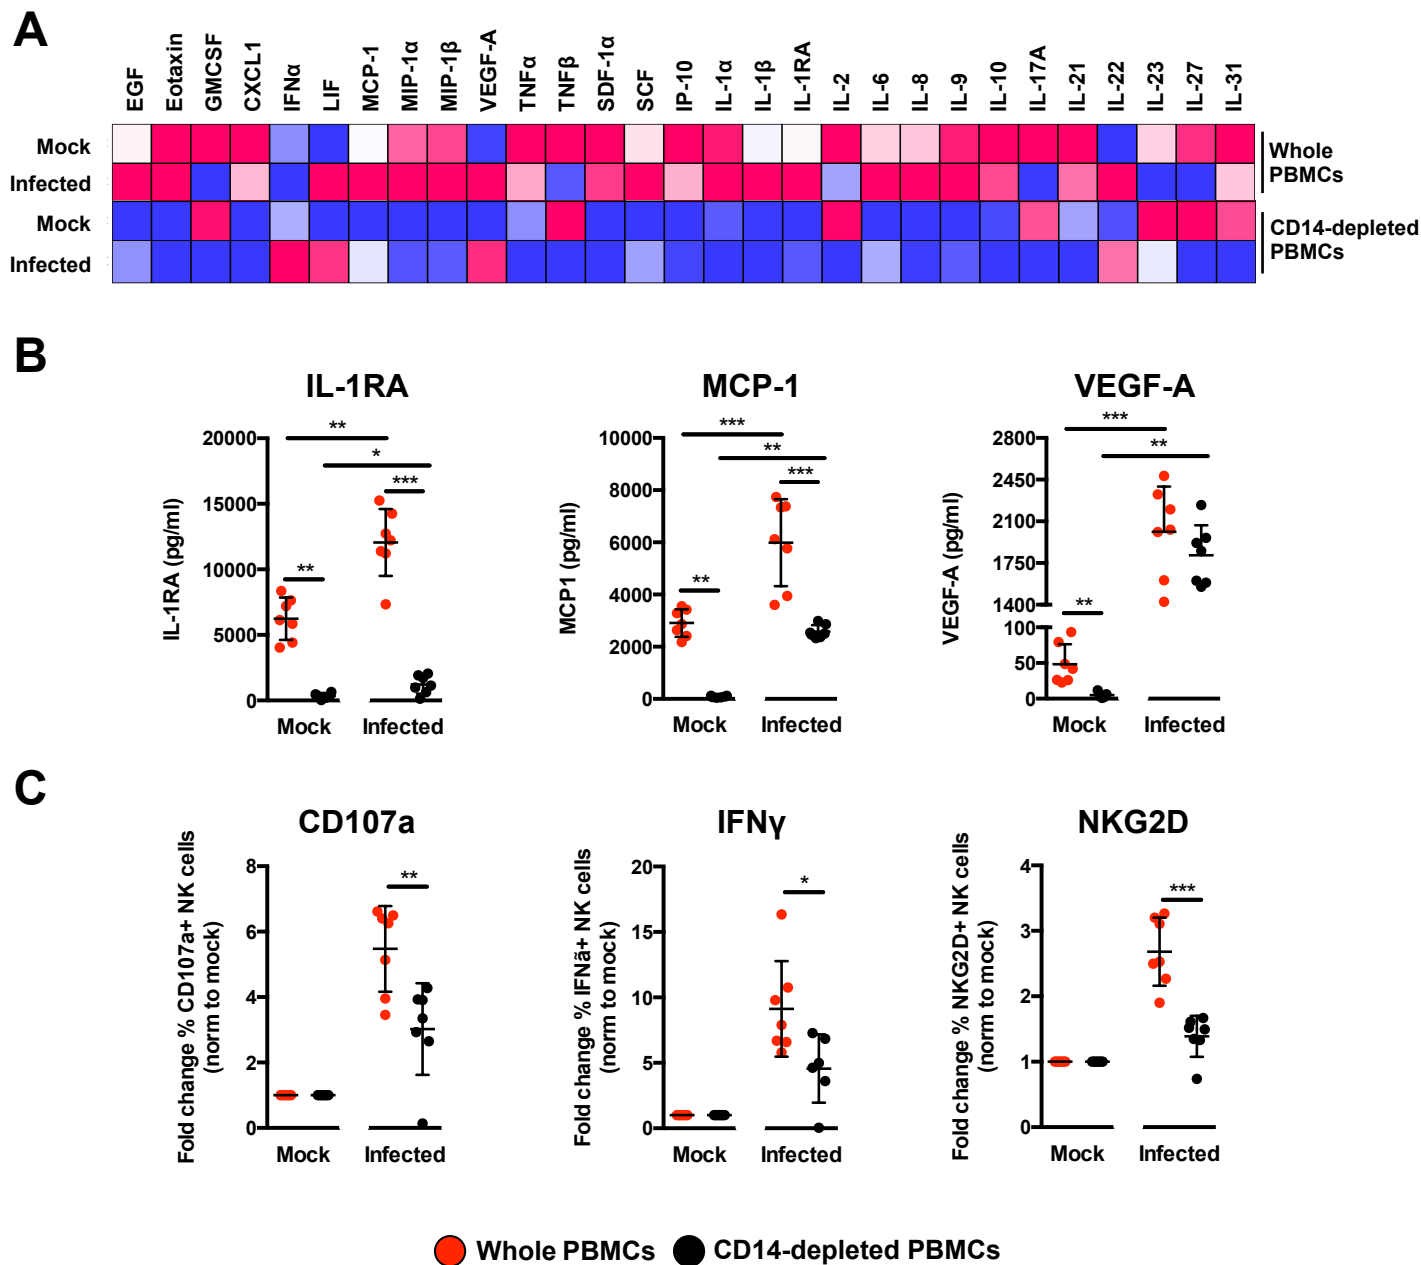

**Figure 7: Immune profiling of ZIKV-infected PBMCs.** (A) Immune mediators in the culture supernatant of ZIKV-infected PBMCs and CD14-depleted PBMCs were quantified with a 45-plex microbeads assay. Concentrations were scaled between 0 and 1. (B) Bar-charts of three cytokines, which levels were significantly affected by both the depletion of CD14<sup>+</sup> monocytes and ZIKV infection. (C) Stimulatory capacity of the culture supernatants were further evaluated with freshly isolated PBMCs. Culture supernatant was added in a ratio of 1:10 and cells were harvested at 36 hours post-stimulation. Compiled percentages of CD107a, IFN $\gamma$ , and NKG2D-positive CD94<sup>+</sup>CD56<sup>+</sup> NK cells are shown as normalized to the respective mock sample. Data displayed were derived from seven donors. Lineage markers CD3, CD19, CD20 and CD14 have been included to rule out the presence of non-NK cells. All data are presented as mean  $\pm$  SD. \* $P < 0.05$ , \*\* $P < 0.01$ , \*\*\* $P < 0.001$ , by Mann Whitney  $U$  test, two tailed. Abbreviations: NK, natural killer; PMBC, peripheral blood mononuclear cell.

**Table 1: Summary of nucleotide differences at specific genome positions**

| Position in consensus sequence <sup>A</sup> | Nucleotide difference | Sample(s)                                                                                                                 |
|---------------------------------------------|-----------------------|---------------------------------------------------------------------------------------------------------------------------|
| 1904                                        | g → a                 | D1 MNC ZIKV 72hpi                                                                                                         |
| 2673                                        | t → c                 | D2 MDM ZIKV 24hpi    D2 MNC ZIKV 72hpi                                                                                    |
| 2815                                        | t                     | D1 MDM ZIKV 24hpi    D2 MDM ZIKV 24hpi<br>D2 MDM ZIKV 72hpi    D1 MNC ZIKV 72hpi<br>D2 MNC ZIKV 72hpi                     |
|                                             | c                     | D3 MDM ZIKV 24hpi    D3 MDM ZIKV 72hpi<br>D4 MDM ZIKV 24hpi    D5 MDM ZIKV 24hpi<br>D5 MDM ZIKV 72hpi    PF/ZIKV/HPF/2013 |
| 4211                                        | a                     | D3 MDM ZIKV 24hpi    D3 MDM ZIKV 72hpi<br>D4 MDM ZIKV 24hpi    D5 MDM ZIKV 24hpi<br>D5 MDM ZIKV 72hpi    PF/ZIKV/HPF/2013 |
|                                             | g                     | D1 MDM ZIKV 24hpi    D2 MDM ZIKV 24hpi<br>D2 MDM ZIKV 72hpi    D1 MNC ZIKV 72hpi<br>D2 MNC ZIKV 72hpi                     |
| 10253                                       | t → c                 | D1 MDM ZIKV 24hpi    D2 MNC ZIKV 72hpi                                                                                    |
| 10472                                       | t → c                 | D1 MNC ZIKV 72hpi                                                                                                         |

The phylogenetic tree shown in Figure 3B revealed specific nucleotide differences at 6 different positions within the consensus sequence. All samples included had a mean coverage of greater than 10. PF/ZIKV/HPF/2013 represents the virus used for the infection and therefore, denoted as the reference sample in this analysis. Abbreviations: MNC, monocytes; MDM, monocyte-derived macrophage. <sup>A</sup>Note that minor variant file numbering of positions starts at 0 rather than 1.



**Table 2: Selected nucleotide positions from the minor variants file of the inoculum**

| Position in consensus sequence <sup>A</sup> | Frequency of minor nucleotide variants |         |          |          |           |
|---------------------------------------------|----------------------------------------|---------|----------|----------|-----------|
|                                             | A                                      | C       | G        | T(U)     | D (A/G/T) |
| 1904                                        | 0.11324                                | 0       | 0.88601  | 0.00074  | 0         |
| 2673                                        | 0.00681                                | 0.11779 | 0.000619 | 0.87476  | 0         |
| 2815                                        | 0.00876                                | 0.64463 | 0        | 0.34659  | 0         |
| 4211                                        | 0.65122                                | 0       | 0.34815  | 0.000626 | 0         |
| 10253                                       | 0.000891                               | 0.11229 | 0        | 0.8868   | 0         |
| 10472                                       | 0.00108                                | 0.00543 | 0.00108  | 0.99239  | 0         |

Table showing the frequency distribution of minor nucleotide variants at six positions in the consensus sequence. Major variant (i.e. the consensus nucleotide) at each position is indicated by the nucleotide with the highest frequency. <sup>A</sup>Note that minor variant file numbering of positions starts at 0 rather than 1.
